# Supplementary material
Source: PubMed Central journal article supplement (PMC7111456)
Supplement: NIHMS1068767-supplement-SI.pdf [file NIHMS1068767-supplement-SI.pdf]

## **Supporting Information**

### **Nickel-Catalyzed Alkylation of Amide Derivatives**

Bryan J. Simmons,<sup>†</sup> Nicholas A. Weires,<sup>†</sup> Jacob E. Dander, and Neil K. Garg\*

*Department of Chemistry and Biochemistry, University of California  
Los Angeles, California 90095*

E-mail: neilgarg@chem.ucla.edu

#### Supporting Information – Table of Contents

|                                                                                      |            |
|--------------------------------------------------------------------------------------|------------|
| <b>Materials and Methods .....</b>                                                   | <b>S2</b>  |
| <b>Experimental Procedures .....</b>                                                 | <b>S3</b>  |
| <b>A. Syntheses of Amide Substrates.....</b>                                         | <b>S3</b>  |
| <b>B. Preparation of Organozinc Halides .....</b>                                    | <b>S6</b>  |
| <b>C. Initial Survey of Naphthamide Substrates with Benzylzinc Bromide (5) .....</b> | <b>S7</b>  |
| <b>D. Relevant Control Experiments in the Alkylation of Amide 4e .....</b>           | <b>S9</b>  |
| <b>E. Scope of Methodology.....</b>                                                  | <b>S10</b> |
| <b>F. Gram-Scale Alkylation to Form Ketone 21 .....</b>                              | <b>S15</b> |
| <br>                                                                                 |            |
| <b>References.....</b>                                                               | <b>S16</b> |
| <br>                                                                                 |            |
| <b><sup>1</sup>H NMR Spectra .....</b>                                               | <b>S17</b> |
| <b><sup>13</sup>C NMR Spectra... ..</b>                                              | <b>S36</b> |

**Materials and Methods.** Unless stated otherwise, reactions were conducted in flame-dried glassware under an atmosphere of nitrogen and commercially obtained reagents were used as received. Non-commercially available substrates were synthesized following protocols specified in Section A in the Experimental Procedures. Prior to use, tetrahydrofuran was purified by distillation and taken through five freeze-pump-thaw cycles. Iodine was obtained from Spectrum Chemical. Benzyl bromide, 1-bromopropane, 1-iodo-2,2-dimethylpropane, 2-bromopropane, 2-bromobutane, iodocyclohexane, bromocyclopentane, acid chlorides **SI-1**, **SI-5**, and carboxylic acid **SI-3** were obtained from Sigma–Aldrich and used as received. *N*,4-Dimethylbenzenesulfonamide (**SI-2**) and carboxylic acid **SI-7** were obtained from Combi-Blocks. Ni(cod)<sub>2</sub>, SIPr, and Zn powder (325 mesh, 99.9%) were obtained from Strem Chemicals and stored in a glove box. Anhydrous lithium chloride (99%) was obtained from Alfa Aesar and stored in a glove box. Chlorotrimethylsilane and 1,2-dibromoethane were obtained from Alfa Aesar and Sigma–Aldrich, respectively, and distilled before use. Reaction temperatures were controlled using an IKAmag temperature modulator, and unless stated otherwise, reactions were performed at room temperature (approximately 23 °C). Thin-layer chromatography (TLC) was conducted with EMD gel 60 F254 pre-coated plates (0.25 mm for analytical chromatography and 0.50 mm for preparative chromatography) and visualized using a combination of UV, anisaldehyde, and potassium permanganate staining techniques. Silicycle Siliaflash P60 (particle size 0.040–0.063 mm) was used for flash column chromatography. <sup>1</sup>H NMR spectra were recorded on Bruker spectrometers (at 300, 400 and 500 MHz) and are reported relative to residual solvent signals. Data for <sup>1</sup>H NMR spectra are reported as follows: chemical shift (δ ppm), multiplicity, coupling constant (Hz), integration. Data for <sup>13</sup>C NMR are reported in terms of chemical shift (at 75 and 125 MHz). <sup>19</sup>F NMR spectra were recorded on Bruker spectrometers (at 282 MHz) and reported in terms of chemical shift (δ ppm). IR spectra were recorded on a Perkin-Elmer UATR Two FT-IR spectrometer and are reported in terms of frequency absorption (cm<sup>-1</sup>). High-resolution mass spectra were obtained on Thermo Scientific™ Exactive Mass Spectrometer with DART ID-CUBE.

## Experimental Procedures

### A. Syntheses of Amide Substrates

**Representative Procedure A for the synthesis of amide substrates from Scheme 1, Figures 2 and 3 (synthesis of amide 4e is used as an example).**

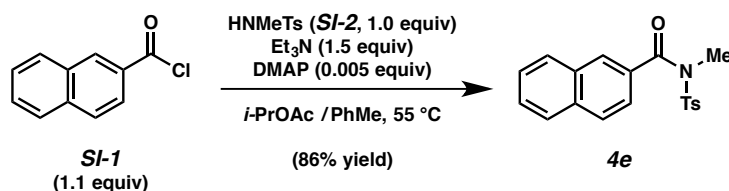

To a solution of sulfonamide **SI-2** (3.00 g, 16.2 mmol, 1.0 equiv), DMAP (9.9 mg, 0.081 mmol, 0.005 equiv), triethylamine (3.40 mL, 24.3 mmol, 1.5 equiv), and *i*-PrOAc (35.2 mL) at 55 °C was added dropwise a solution of acid chloride **SI-1** (3.41 g, 17.8 mmol, 1.1 equiv) in toluene (10.0 mL, 0.46 M in total) over 1 min. The reaction mixture was stirred at 55 °C for 1 h. After cooling the reaction mixture to room temperature, the reaction was quenched by the addition of 1.0 M aqueous HCl (10 mL). The resulting biphasic mixture was transferred to a separatory funnel with EtOAc (30 mL) and extracted with EtOAc (3 x 30 mL). The organic layers were combined, dried over Na<sub>2</sub>SO<sub>4</sub>, and the volatiles were removed under reduced pressure. The resulting crude residue was purified by flash chromatography (24:1 Hexanes:EtOAc → 14:1 Hexanes:EtOAc → 9:1 Hexanes:EtOAc) to yield amide **4e** (5.2 g, 86% yield) as a white solid. Amide **4e**: mp: 96–98 °C; R<sub>f</sub> 0.50 (7:3 Hexanes:EtOAc); <sup>1</sup>H NMR (500 MHz, CDCl<sub>3</sub>): δ 8.07–8.06 (s, 1H), 7.87–7.84 (m, 5H), 7.62–7.53 (m, 3H), 7.34–7.32 (m, 2H), 3.34 (s, 3H), 2.44 (s, 3H); <sup>13</sup>C NMR (125 MHz, CDCl<sub>3</sub>): δ 171.9, 145.2, 135.6, 135.1, 132.5, 132.0, 130.0, 129.9, 129.3, 128.8, 128.5, 128.5, 128.2, 127.3, 124.9, 36.0, 22.0; IR (film): 3060, 2954, 2922, 1682, 1356 cm<sup>-1</sup>; HRMS-ESI (*m/z*) [M + H]<sup>+</sup> calcd for C<sub>19</sub>H<sub>18</sub>NO<sub>3</sub>S, 340.10074; found 340.09984.

**Representative Procedure B for the synthesis of amide substrates from Scheme 1, Figures 2 and 3 (synthesis of amide SI-4 is used as an example).**

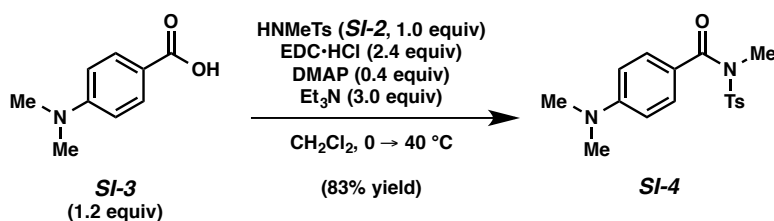

To a solution of sulfonamide **SI-2** (1.00 g, 5.40 mmol, 1.0 equiv), EDC·HCl (2.48 g, 13.0 mmol, 2.4 equiv), DMAP (263 mg, 2.16 mmol, 0.4 equiv), triethylamine (2.30 mL, 16.2 mmol, 3.0 equiv), and CH<sub>2</sub>Cl<sub>2</sub> (15.4 mL, 0.35 M) at 0 °C was added carboxylic acid **SI-3** (1.07 g, 6.48 mmol, 1.2 equiv) as a solid in one portion. The reaction mixture was allowed to come to room temperature and then stirred at 40 °C for 16 h. After cooling to room temperature, the reaction mixture was transferred to a separatory funnel with EtOAc (30 mL) and washed with 1.0 M aqueous HCl (2 x 10 mL), followed by 1.0 M aqueous NaOH (2 x 10 mL), and deionized water (10 mL). The organic layer was dried over Na<sub>2</sub>SO<sub>4</sub>, and the volatiles were removed under reduced pressure. The resulting crude residue was purified by flash chromatography (20:1 Benzene:Et<sub>2</sub>O) to yield amide **SI-4** (1.48 g, 83% yield) as an off-white solid. Amide **SI-4**: mp: 104–106 °C; R<sub>f</sub> 0.52 (3:2 Hexanes:EtOAc); <sup>1</sup>H NMR (500 MHz, CDCl<sub>3</sub>): δ 7.85 (d, *J* = 8.2, 2H), 7.65 (d, *J* = 9.0, 2H), 7.31 (d, *J* = 8.2, 2H), 6.63 (d, *J* = 8.9, 2H), 3.20 (s, 3H), 3.05 (s, 6H), 2.43 (s, 3H); <sup>13</sup>C NMR (125 MHz, CDCl<sub>3</sub>): δ 172.0, 153.7, 144.7, 135.5, 132.3, 129.8, 128.8, 120.5, 110.8, 40.4, 36.4, 21.9; IR (film): 3060, 2917, 2823, 1672, 1600 cm<sup>-1</sup>; HRMS-ESI (*m/z*) [M + H]<sup>+</sup> calcd for C<sub>17</sub>H<sub>21</sub>N<sub>2</sub>O<sub>3</sub>S, 333.12729; found 333.12611

Note: Supporting information for the syntheses of some amides shown in Scheme 1, Figures 2 and 3, and Scheme 2 have previously been reported: **4a**,<sup>1a</sup> **4b**,<sup>1b</sup> **4c**,<sup>1c</sup> **4d**,<sup>1d</sup> **SI-14**,<sup>1e</sup> **SI-15**,<sup>1f</sup> **SI-16**,<sup>1d</sup> and **19**.<sup>1d</sup> Syntheses for the remaining substrates shown in Scheme 1, Figures 2 and 3 are as follows:

*Any modifications of the conditions shown in the representative procedures above are specified in the following schemes.*

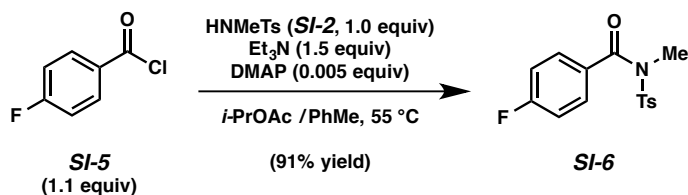

**Amide SI-6.** Followed representative procedure A. Purification by flash chromatography (9:1 Hexanes:EtOAc) generated amide **SI-6** (91% yield) as a white solid. Amide **SI-6**: mp: 80–83 °C;  $R_f$  0.54 (7:3 Hexanes:EtOAc);  $^1\text{H NMR}$  (500 MHz,  $\text{CDCl}_3$ ):  $\delta$  7.77 (d,  $J = 8.3$ , 2H), 7.62–7.59 (m, 2H), 7.33 (d,  $J = 8.0$ , 2H), 7.12–7.08 (m, 2H), 3.24 (s, 3H), 2.45 (s, 3H);  $^{13}\text{C NMR}$  (125 MHz,  $\text{CDCl}_3$ ):  $\delta$  171.0, 165.3 (d,  $J_{\text{C-F}} = 253.9$ ), 145.4, 135.3, 131.7 (d,  $J_{\text{C-F}} = 9.1$ ), 131.1 (d,  $J_{\text{C-F}} = 3.3$ ), 130.1, 128.6, 115.8 (d,  $J_{\text{C-F}} = 22.2$ ), 35.8, 22.0;  $^{19}\text{F NMR}$  (282 MHz,  $\text{CDCl}_3$ ):  $\delta$  106.1; IR (film): 3074, 2954, 2924, 1683, 1596  $\text{cm}^{-1}$ ; HRMS-ESI ( $m/z$ )  $[\text{M} + \text{H}]^+$  calcd for  $\text{C}_{15}\text{H}_{15}\text{FNO}_3\text{S}$ , 308.07567; found 308.07463.

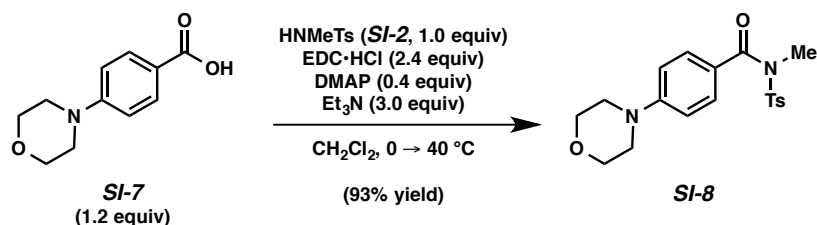

**Amide SI-8.** Followed representative procedure B. Purification by flash chromatography (1:1 Hexanes:EtOAc) generated amide **SI-8** (93% yield) as a white solid. Amide **SI-8**: mp: 141–143 °C;  $R_f$  0.60 (3:7 Hexanes:EtOAc);  $^1\text{H NMR}$  (500 MHz,  $\text{CDCl}_3$ ):  $\delta$  7.83 (d,  $J = 8.3$ , 2H), 7.63 (d,  $J = 8.8$ , 2H), 7.32 (d,  $J = 8.3$ , 2H), 6.84 (d,  $J = 8.8$ , 2H), 3.85 (t,  $J = 4.8$ , 4H), 3.29 (t,  $J = 4.8$ , 4H), 3.21 (s, 3H), 2.43 (s, 3H);  $^{13}\text{C NMR}$  (125 MHz,  $\text{CDCl}_3$ ):  $\delta$  171.7, 154.3, 144.9, 135.4, 131.8, 129.9, 128.8, 124.1, 113.5, 66.9, 47.9, 36.3, 22.0; IR (film): 3049, 2964, 2854, 1673, 1601  $\text{cm}^{-1}$ ; HRMS-ESI ( $m/z$ )  $[\text{M} + \text{H}]^+$  calcd for  $\text{C}_{19}\text{H}_{23}\text{N}_2\text{O}_4\text{S}$ , 375.13785; found 375.13717.

**B. Preparation of Organozinc Halides**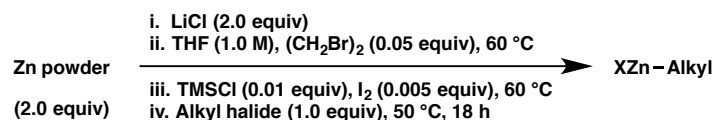

Following a modification of the procedure reported by Knochel,<sup>2</sup> a flame-dried 25 mL round bottom flask equipped with a magnetic stir bar and rubber septum was brought into a glove box where Zn powder (650 mg, 10.0 mmol, 2.0 equiv, Strem 325 mesh) and anhydrous LiCl (420 mg, 10.0 mmol, 2.0 equiv) were added. The flask was then removed from the glove box and heated with a heat gun for 10 min under high vacuum, cooled to room temperature, and then backfilled with N<sub>2</sub>. Freshly distilled THF (5.0 mL) and 1,2-dibromoethane (22  $\mu$ L, 0.25 mmol, 0.05 equiv) were added via syringe and the reaction mixture was heated at 60  $^\circ$ C for 20 min. After cooling to room temperature, freshly distilled TMSCl (6  $\mu$ L, 0.05 mmol, 0.01 equiv) followed by a solution of I<sub>2</sub> (6.4 mg, 0.025 mmol, 0.005 equiv) in THF (25  $\mu$ L, 1.0 M) were added via syringe and the reaction mixture was heated again at 60  $^\circ$ C for 20 min. After cooling to room temperature, the alkyl halide (5.0 mmol, 1.0 equiv) was added dropwise via syringe over 1 min. A flame-dried air condenser was attached to the flask under N<sub>2</sub> and the reaction vessel was heated at 50  $^\circ$ C for 18 h. The reaction mixture was cooled to room temperature and allowed to stand for 1 h before the supernatant fluid was transferred to a flame-dried schlenk flask via syringe. The concentration of the organozinc halide was determined by iodometric titration using Knochel's procedure.<sup>3</sup>

*Note: The use of organozinc reagents with lower titers led to lower yields in the subsequent coupling reactions.*

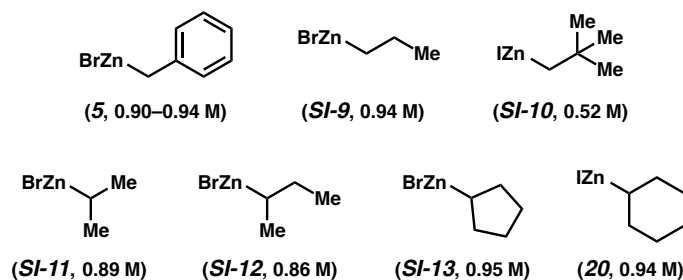

### C. Initial Survey of Naphthamide Substrates with Benzylzinc Bromide (5)

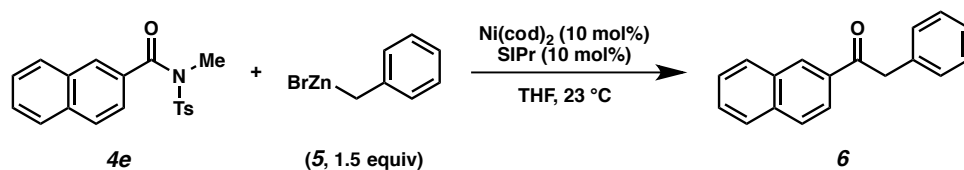

**Representative Procedure for alkylation reactions of naphthamides from Tables S1 and S2 (coupling of amide **4e** and benzylzinc bromide (**5**) is used as an example).** A 1-dram vial was charged with a magnetic stir bar and flame-dried under reduced pressure, and then allowed to cool under  $\text{N}_2$ . Amide substrate **4e** (67.8 mg, 0.200 mmol, 1.0 equiv) and hexamethylbenzene (3.2 mg, 0.020 mmol, 0.1 equiv) were added, and the vial was flushed with  $\text{N}_2$ . The vial was taken into a glove box and charged with  $\text{Ni}(\text{cod})_2$  (5.5 mg, 0.020 mmol, 10 mol%) and SIPr (7.8 mg, 0.020 mmol, 10 mol%). Subsequently, THF (0.20 mL, 1.0 M) was added, and the vial was removed from the glove box and the reaction was allowed to stir at 23 °C for 1 h. Concurrently, the benzylzinc bromide solution (**5**) was heated in a water bath at 50 °C for 1 h. A portion of the preheated solution of **5** (333  $\mu\text{L}$ , 0.300 mmol, 1.5 equiv, 0.90 M in THF) was then added to the reaction mixture dropwise via syringe over 3 sec. The vial was then capped with a Teflon-lined screw cap under a flow of  $\text{N}_2$ . The reaction mixture was allowed to stir at 23 °C for 24 h. The reaction was quenched by the addition of a saturated aqueous solution of  $\text{NH}_4\text{Cl}$  (0.5 mL), and the resulting aqueous layer was extracted with EtOAc (3 x 2 mL). The combined organics were filtered over a plug of silica gel (10 mL of EtOAc eluent). The volatiles were removed under reduced pressure, and the yield was determined by  $^1\text{H}$  NMR analysis with hexamethylbenzene as an internal standard.

*Any modifications of the conditions shown in the representative procedure above are specified below in Tables S1 and S2.*

**Table S1.** Initial Survey of Naphthamide Substrates with Benzylzinc Bromide (5)<sup>a</sup>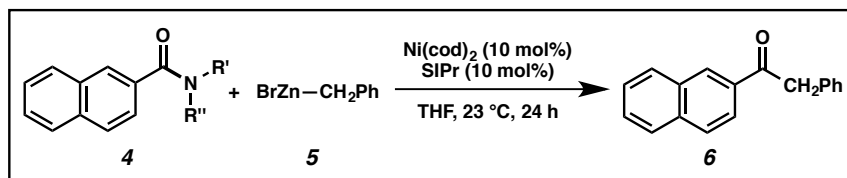

| Entry |  | Recovered 4 | Yield of Ketone 6 |
|-------|--|-------------|-------------------|
| 1     |  | 100%        | 0%                |
| 2     |  | 51%         | 0%                |
| 3     |  | 100%        | 0%                |
| 4     |  | 40%         | 60%               |
| 5     |  | 17%         | 81%               |

<sup>a</sup> Yields were determined by <sup>1</sup>H NMR analysis using hexamethylbenzene as an internal standard.



## D. Relevant Control Experiments in the Alkylation of Amide 4e

Table S2. Relevant Control Experiments in the Alkylation of Amide 4e<sup>a</sup>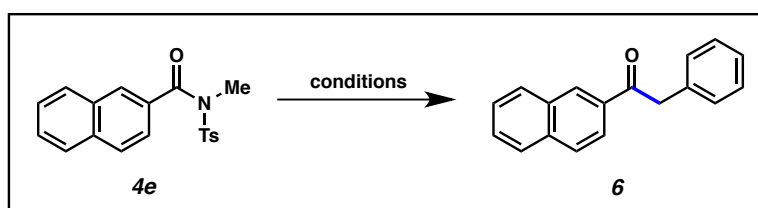

| Reaction Conditions                                                                            | Experimental Results |                  |
|------------------------------------------------------------------------------------------------|----------------------|------------------|
|                                                                                                | 4e                   | 6                |
| BnZnBr (1.5 equiv), Ni(cod) <sub>2</sub> (10 mol%), SIPr (10 mol%)<br>THF (1.0 M), 23 °C, 24 h | 17%                  | 81%              |
| <b>Control Experiments:</b>                                                                    |                      |                  |
| BnZnBr (1.5 equiv)<br>THF (1.0 M), 23 °C, 24 h                                                 | 100%                 | 0%               |
| BnZnBr (1.5 equiv), SIPr (10 mol%)<br>THF (1.0 M), 23 °C, 24 h                                 | 100%                 | 0%               |
| BnZnBr (1.5 equiv), Ni(cod) <sub>2</sub> (10 mol%)<br>THF (1.0 M), 23 °C, 24 h                 | 33%                  | 35% <sup>b</sup> |

<sup>a</sup> Yields were determined by <sup>1</sup>H NMR analysis using hexamethylbenzene as an internal standard.

<sup>b</sup> Some conversion to the ketone was observed in the absence of SIPr, but in greatly diminished yield relative to the experiment run with both Ni(cod)<sub>2</sub> and SIPr. Additionally, use of these conditions with other substrates was even less successful.

## E. Scope of Methodology

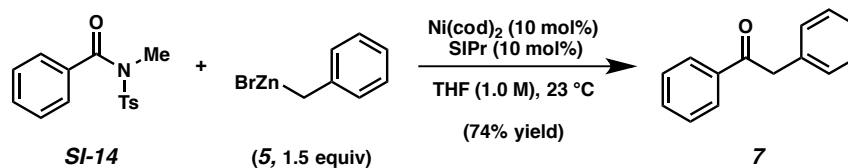

**Representative Procedure (coupling of amide SI-14 and benzylzinc bromide (5) is used as an example). Ketone 7.** A 1-dram vial was charged with a magnetic stir bar and flame-dried under reduced pressure, and then allowed to cool under  $\text{N}_2$ . Amide substrate **SI-14** (57.8 mg, 0.200 mmol, 1.0 equiv) was added, and the vial was flushed with  $\text{N}_2$ . The vial was taken into a glove box and charged with  $\text{Ni}(\text{cod})_2$  (5.5 mg, 0.020 mmol, 10 mol%) and SIPr (7.8 mg, 0.020 mmol, 10 mol%). Subsequently, THF (0.20 mL, 1.0 M) was added, and the vial was removed from the glove box and the reaction was allowed to stir at 23 °C for 1 h. Concurrently, the benzylzinc bromide solution (**5**) was heated in a water bath at 50 °C for 1 h. A portion of the preheated solution of **5** (319  $\mu\text{L}$ , 0.300 mmol, 1.5 equiv, 0.94 M in THF) was then added to the reaction mixture dropwise via syringe over 3 sec. The vial was then capped with a Teflon-lined screw cap under a flow of  $\text{N}_2$ . The reaction mixture was allowed to stir at 23 °C for 24 h. The reaction was quenched by the addition of a saturated aqueous solution of  $\text{NH}_4\text{Cl}$  (0.5 mL), and the resulting aqueous layer was extracted with EtOAc (3 x 2 mL). The combined organics were filtered over a plug of silica gel (10 mL of EtOAc eluent). The volatiles were removed under reduced pressure, and the crude residue was purified by preparative thin-layer chromatography (5:1 Hexanes:EtOAc) to yield ketone product **7** (74% yield, average of two experiments) as a white solid. Ketone **7**:  $R_f$  0.54 (5:1 Hexanes:EtOAc). Spectral data match those previously reported.<sup>4</sup>

*Any modifications of the conditions shown in the representative procedure above are specified in the following schemes, which depict all of the results shown in Figures 2 and 3.*

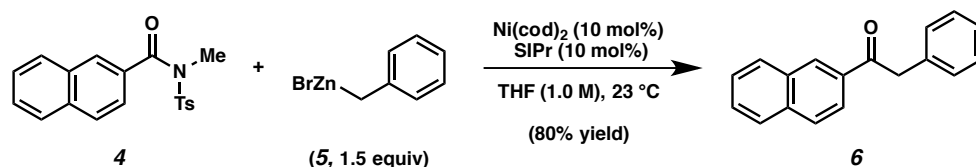

**Ketone 6.** Purification by preparative thin-layer chromatography (5:1 Hexanes:EtOAc) generated ketone **6** (80% yield, average of two experiments) as a white solid. Ketone **6**:  $R_f$  0.53 (5:1 Hexanes:EtOAc). Spectral data match those previously reported.<sup>4</sup>

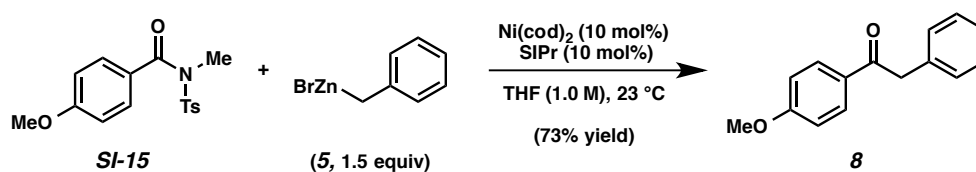

**Ketone 8.** Purification by preparative thin-layer chromatography (4:1 Hexanes:EtOAc) generated ketone **8** (73% yield, average of two experiments) as a white solid. Ketone **8**:  $R_f$  0.46 (4:1 Hexanes:EtOAc). Spectral data match those previously reported.<sup>5</sup>

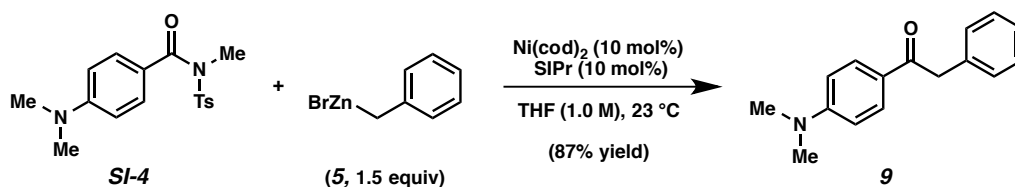

**Ketone 9.** Purification by flash chromatography (8:1:1 PhH:Et<sub>2</sub>O:CH<sub>2</sub>Cl<sub>2</sub>) generated ketone **9** (87% yield, average of two experiments) as a white solid. Ketone **9**:  $R_f$  0.46 (8:1:1 PhH:Et<sub>2</sub>O:CH<sub>2</sub>Cl<sub>2</sub>). Spectral data match those previously reported.<sup>6</sup>

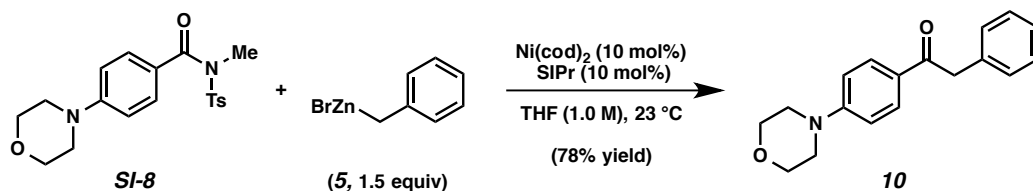

**Ketone 10.** Purification by flash chromatography (10:5:1  $\text{CHCl}_3$ :Hexanes: $\text{CH}_3\text{CN}$ ) followed by preparative thin-layer chromatography (10:2:1  $\text{CHCl}_3$ :Hexanes: $\text{CH}_3\text{CN}$ ) generated ketone **10** (78% yield, average of two experiments) as a white solid. Ketone **10**: mp: 138–139 °C;  $R_f$  0.64 (3:2 Hexanes:EtOAc);  $^1\text{H}$  NMR (500 MHz,  $\text{CD}_3\text{CN}$ ):  $\delta$  7.94–7.88 (m, 2H), 7.33–7.19 (m, 5H), 6.95–6.89 (m, 2H), 4.21 (s, 2H), 3.77–3.73 (m, 4H), 3.29–3.24 (m, 4H);  $^{13}\text{C}$  NMR (125 MHz,  $\text{CD}_3\text{CN}$ ):  $\delta$  196.8, 155.5, 137.1, 131.4, 130.6, 129.4, 127.9, 127.4, 114.1, 67.1, 48.1, 45.5; IR (film): 3042, 2957, 2857, 2840, 1675, 1595  $\text{cm}^{-1}$ ; HRMS-ESI ( $m/z$ )  $[\text{M} + \text{H}]^+$  calcd for  $\text{C}_{11}\text{H}_{18}\text{O}_2$ , 282.14940; found 282.14800.

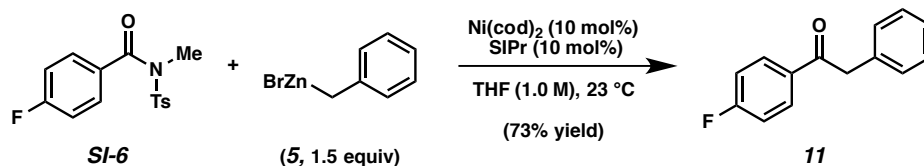

**Ketone 11.** Purification by preparative thin-layer chromatography (5:1 Hexanes:EtOAc) generated ketone **11** (73% yield, average of two experiments) as a white solid. Ketone **11**:  $R_f$  0.50 (5:1 Hexanes:EtOAc). Spectral data match those previously reported.<sup>4</sup>

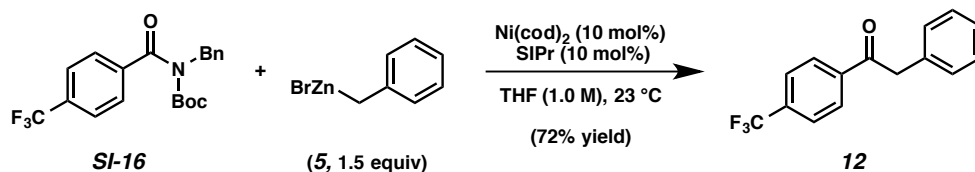

**Ketone 12.** Purification by flash chromatography (100% PhH) generated ketone **12** (72% yield, average of two experiments) as a white solid. Ketone **12**:  $R_f$  0.68 (100% PhH). Spectral data match those previously reported.<sup>7</sup>

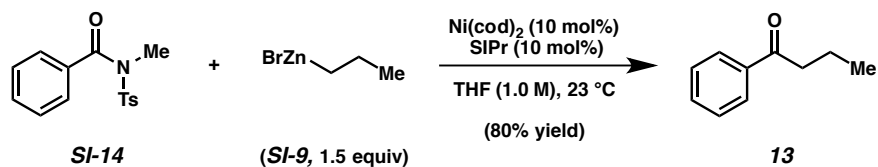

**Ketone 13.** Purification by preparative thin-layer chromatography (5:1 Hexanes:EtOAc) generated ketone **13** (80% yield, average of two experiments) as a colorless oil. Ketone **13**:  $R_f$  0.57 (5:1 Hexanes:EtOAc). Spectral data match those previously reported.<sup>4</sup>

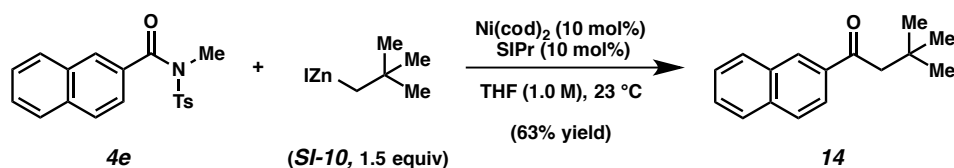

**Ketone 14.** Purification by preparative thin-layer chromatography (5:1 Hexanes:EtOAc) generated ketone **14** (63% yield, average of two experiments) as a colorless oil. Ketone **14**:  $R_f$  0.63 (5:1 Hexanes:EtOAc). Spectral data match those previously reported.<sup>8</sup>

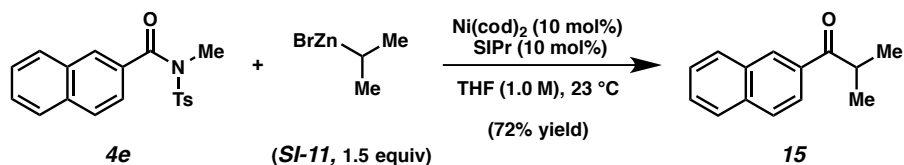

**Ketone 15.** Purification by preparative thin-layer chromatography (5:1 Hexanes:EtOAc) generated ketone **15** (72% yield, average of two experiments) as a colorless oil. Ketone **15**:  $R_f$  0.64 (5:1 Hexanes:EtOAc). Spectral data match those previously reported.<sup>9</sup>

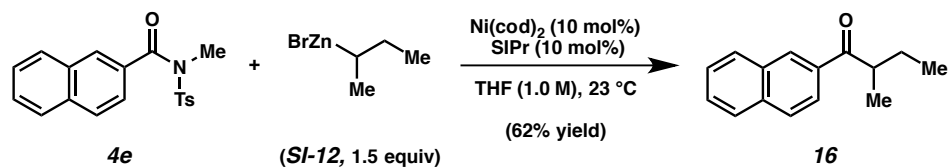

**Ketone 16.** Purification by preparative thin-layer chromatography (5:1 Hexanes:EtOAc) generated ketone **16** (62% yield, average of two experiments) as a colorless oil. Ketone **16**:  $R_f$  0.44 (10:1 Hexanes:EtOAc);  $^1\text{H NMR}$  (500 MHz,  $\text{C}_6\text{D}_6$ ):  $\delta$  8.35 (br s, 1H), 8.13 (dd,  $J = 8.6, 1.6$ , 1H), 7.63 (d,  $J = 7.9$ , 1H), 7.56 (d,  $J = 8.6$ , 1H), 7.53 (d,  $J = 7.9$ , 1H) 7.27–7.19 (m, 1H), 3.26–3.18 (m, 1H), 1.93–1.83 (m, 1H), 1.48–1.38 (m, 1H), 1.14 (d,  $J = 6.9$ , 3H), 0.83 (t,  $J = 7.5$ , 3H);  $^{13}\text{C NMR}$  (125 MHz,  $\text{CD}_3\text{CN}$ ):  $\delta$  205.3, 136.4, 135.2, 133.7, 130.7, 130.5, 129.5, 129.4, 128.6, 127.8, 125.0, 42.7, 27.6, 17.2, 12.0; IR (film): 3060, 2965, 2932, 2875, 1677, 1625  $\text{cm}^{-1}$ ; HRMS-ESI ( $m/z$ ) [ $\text{M} + \text{H}$ ] $^+$  calcd for  $\text{C}_{11}\text{H}_{18}\text{O}_2$ , 213.12794; found 213.12691.

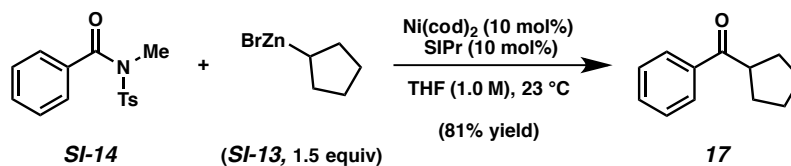

**Ketone 17.** Purification by preparative thin-layer chromatography (5:1 Hexanes:EtOAc) generated ketone **17** (81% yield, average of two experiments) as a colorless oil. Ketone **17**:  $R_f$  0.64 (5:1 Hexanes:EtOAc). Spectral data match those previously reported.<sup>10</sup>

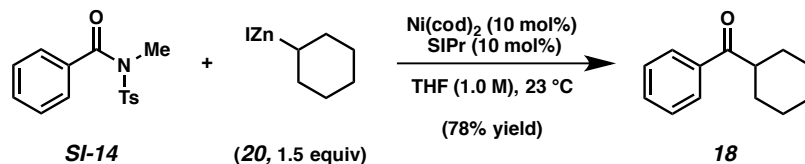

**Ketone 18.** Purification by preparative thin-layer chromatography (5:1 Hexanes:EtOAc) generated ketone **18** (78% yield, average of two experiments) as a colorless oil. Ketone **18**:  $R_f$  0.54 (5:1 Hexanes:EtOAc). Spectral data match those previously reported.<sup>11</sup>

## F. Gram-Scale Alkylation to Form Ketone 21

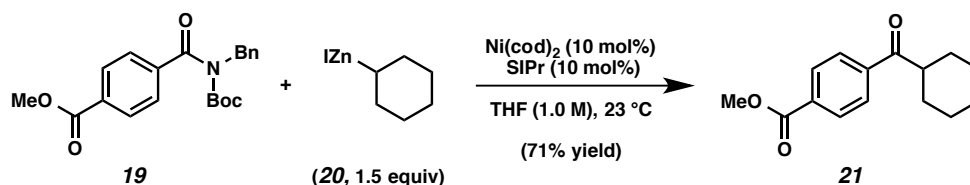

**Ketone 21.** A 20 mL scintillation vial was charged with a magnetic stir bar and flame-dried under reduced pressure, and then allowed to cool under  $\text{N}_2$ . Amide substrate **19** (1.00 g, 2.71 mmol, 1.0 equiv) was added, and the vial was flushed with  $\text{N}_2$ . The vial was taken into a glove box and charged with  $\text{Ni}(\text{cod})_2$  (74.5 mg, 0.270 mmol, 10 mol%) and SIPr (106 mg, 0.270 mmol, 10 mol%). Subsequently, THF (2.7 mL, 1.0 M) was added, and the vial was removed from the glove box and the reaction was allowed to stir at 23 °C for 1 h. Concurrently, the cyclohexylzinc iodide solution (**20**) was heated in a water bath at 50 °C for 1 h. A portion of the preheated solution of **20** (4.32 mL, 4.07 mmol, 1.5 equiv, 0.94 M in THF) was then added to the reaction mixture dropwise via syringe over 5 sec. The vial was then capped with a Teflon-lined screw cap under a flow of  $\text{N}_2$ . The reaction mixture was allowed to stir at 23 °C for 24 h. The reaction was quenched by the addition of a saturated aqueous solution of  $\text{NH}_4\text{Cl}$  (3 mL), and the resulting aqueous layer was extracted with EtOAc (3 x 5 mL). The combined organics were filtered over a plug of silica gel (50 mL of EtOAc eluent). The volatiles were removed under reduced pressure, and the crude residue was purified by flash chromatography (24:1 Hexanes:EtOAc) to yield ketone product **21** (472 mg, 71% yield) as a pale yellow solid. Ketone **21**:  $R_f$  0.50 (5:1 Hexanes:EtOAc). Spectral data match those previously reported.

## References

- <sup>1</sup> (a) Allen, C. L.; Davulcu, S.; Williams, J. M. J. *Org. Lett.* **2010**, *12*, 5096–5099. (b) Krishnamoorthy, R.; Lam, S. Q.; Manley, C. M.; Herr, R. J. *J. Org. Chem.* **2010**, *75*, 1251–1258. (c) Baroudi, A.; Alicea, J.; Flack, P.; Kirincich, J.; Alabugin, I. V. *J. Org. Chem.* **2011**, *76*, 1521–1537. (d) Weires, N. A.; Baker, E. L.; Garg, N. K. *Nat. Chem.* **2016**, *8*, 75–79. (e) Yates, M. H.; Kallman, N. J.; Ley, C. P.; Wei, J. N. *Org. Process Res. Dev.* **2009**, *13*, 255–262. (f) Inamoto, Y.; Kaga, Y.; Nishimoto, Y.; Yasuda, M.; Baba, A. *Org. Lett.* **2013**, *15*, 3452–3455.
- <sup>2</sup> Krasovskiy, A.; Malakhov, V.; Gavryushin, A.; Knochel, P. *Angew. Chem. Int. Ed.* **2006**, *45*, 6040–6044.
- <sup>3</sup> Krasovskiy, A.; Knochel, P. *Synthesis* **2006**, 890–891.
- <sup>4</sup> Zhao, B.; Lu, X. *Tetrahedron Lett.* **2006**, *47*, 6765–6768.
- <sup>5</sup> Ahmad, I.; Pathak, V.; Vasudev, P. G.; Maurya, H. K.; Gupta, A. *RSC Adv.* **2014**, *4*, 24619–24634.
- <sup>6</sup> Dolhem, E.; Barhdadi, R.; Folest, J. C.; Nédelec, J. Y.; Troupel, M. *Tetrahedron* **2001**, *57*, 525–529.
- <sup>7</sup> Takemiya, A.; Hartwig, J. F. *J. Am. Chem. Soc.* **2006**, *128*, 14800–14801.
- <sup>8</sup> Klemm, L. H.; Solomon, W. C.; Tamiz, A. P. *J. Org. Chem.* **1998**, *63*, 6503–6510.
- <sup>9</sup> Jean, M.; Renault, J.; Uriac, P.; Capet, M.; van de Weghe, P. *Org. Lett.* **2007**, *9*, 3623–3625.
- <sup>10</sup> Wu, J.; Yang, X.; He, Z.; Mao, X.; Hatton, T. A.; Jamison, T. F. *Angew. Chem. Int. Ed.* **2014**, *53*, 8416–8420.
- <sup>11</sup> Gonzalez-de-Castro, A.; Xiao, J. *J. Am. Chem. Soc.* **2015**, *137*, 8206–8218.



# <sup>1</sup>H NMR Spectra

8.065  
8.065  
8.063  
7.875  
7.874  
7.857  
7.840  
7.621  
7.618  
7.604  
7.601  
7.588  
7.585  
7.583  
7.572  
7.569  
7.561  
7.559  
7.548  
7.545  
7.543  
7.532  
7.529  
7.336  
7.335  
7.319  
7.318

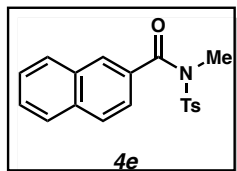

3.340  
2.445

Current Data Parameters  
NAME BJS-2-NMeNTsNaphthyl3  
EXPNO 1  
PROCNO 1

F2 - Acquisition Parameters  
Date\_ 20151124  
Time\_ 18.10  
INSTRUM av500  
PROBHD 5 mm DCH 13C-1  
PULPROG zg30  
TD 65536  
SOLVENT CDCl3  
NS 8  
DS 0  
SWH 10000.000 Hz  
FIDRES 0.152588 Hz  
AQ 3.2767999 sec  
RG 12.14  
DW 50.000 usec  
DE 10.00 usec  
TE 298.0 K  
D1 2.00000000 sec  
TD0 1

===== CHANNEL f1 =====  
SFO1 500.1330008 MHz  
NUC1 1H  
P1 10.00 usec  
PLW1 13.50000000 W

F2 - Processing parameters  
SI 65536  
SF 500.1300120 MHz  
WDW EM  
SSB 0  
LB 0.30 Hz  
GB 0  
PC 1.00

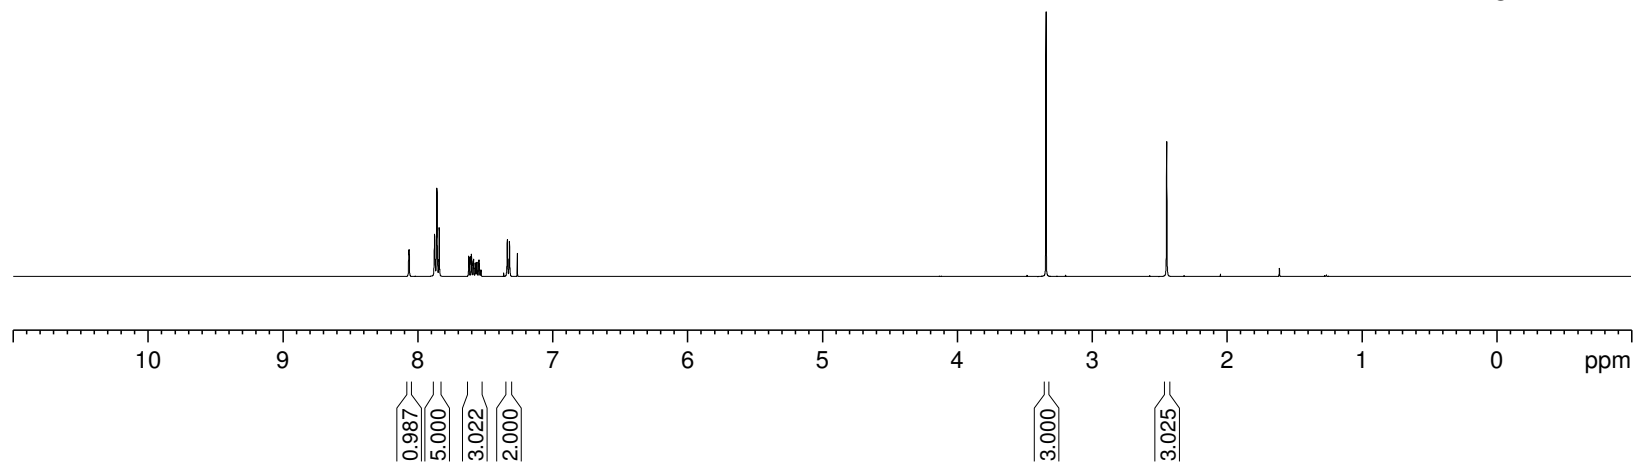

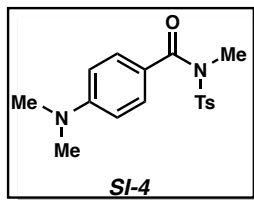

7.861  
7.845  
7.658  
7.640  
7.328  
7.311  
6.644  
6.626

3.202  
3.052  
2.430

Current Data Parameters  
 NAME BJS-2-paraDimethylaminoN  
 EXPNO 1  
 PROCNO 1

F2 - Acquisition Parameters  
 Date\_ 20151122  
 Time 14.40  
 INSTRUM av500  
 PROBHD 5 mm DCH 13C-1  
 PULPROG zg30  
 TD 65536  
 SOLVENT CDCl3  
 NS 8  
 DS 0  
 SWH 10000.000 Hz  
 FIDRES 0.152588 Hz  
 AQ 3.2767999 sec  
 RG 12.14  
 DW 50.000 usec  
 DE 10.00 usec  
 TE 298.0 K  
 D1 2.0000000 sec  
 TD0 1

===== CHANNEL f1 =====  
 SFO1 500.133008 MHz  
 NUC1 1H  
 P1 10.00 usec  
 PLW1 13.5000000 W

F2 - Processing parameters  
 SI 65536  
 SF 500.1300123 MHz  
 WDW EM  
 SSB 0  
 LB 0.30 Hz  
 GB 0  
 PC 1.00

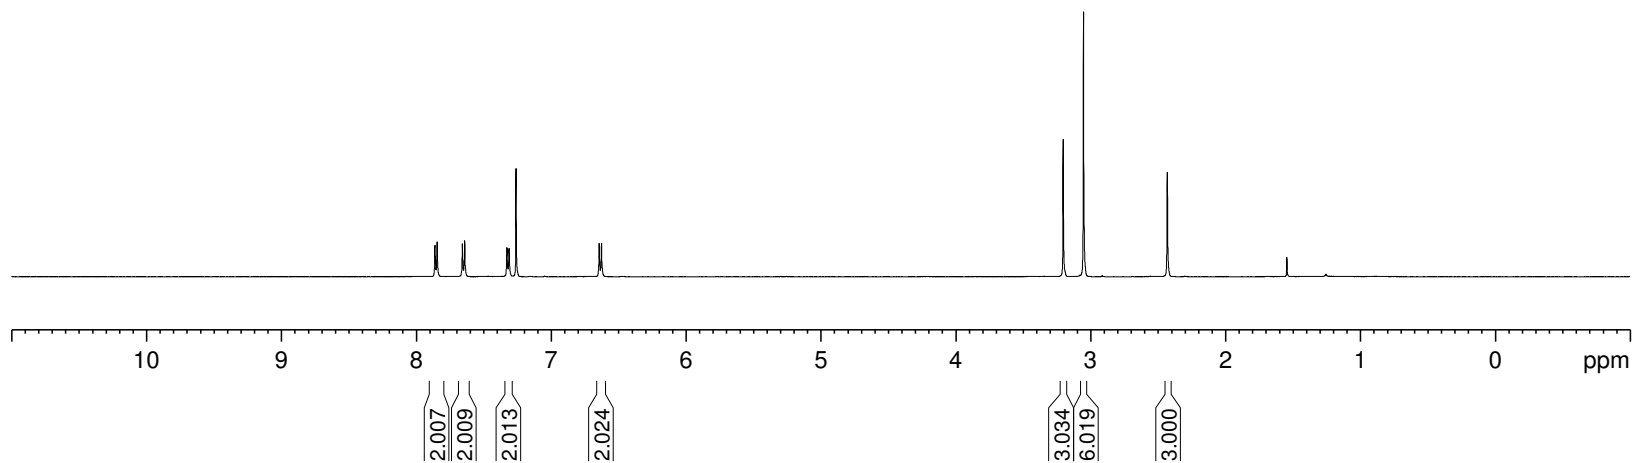

7.785  
7.768  
7.625  
7.614  
7.611  
7.607  
7.597  
7.341  
7.325  
7.115  
7.111  
7.098  
7.081

3.245

2.447

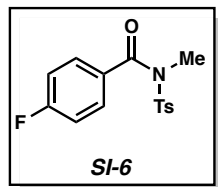

Current Data Parameters  
NAME BJS-2-paraFluoroNMeNTsE  
EXPNO 1  
PROCNO 1

F2 - Acquisition Parameters  
Date\_ 20151122  
Time 14.26  
INSTRUM av500  
PROBHD 5 mm DCH 13C-1  
PULPROG zg30  
TD 65536  
SOLVENT CDCl3  
NS 8  
DS 0  
SWH 10000.000 Hz  
FIDRES 0.152588 Hz  
AQ 3.2767999 sec  
RG 12.14  
DW 50.000 usec  
DE 10.00 usec  
TE 298.0 K  
D1 2.0000000 sec  
TD0 1

===== CHANNEL f1 =====  
SFO1 500.1330008 MHz  
NUC1 1H  
P1 10.00 usec  
PLW1 13.50000000 W

F2 - Processing parameters  
SI 65536  
SF 500.1300124 MHz  
WDW EM  
SSB 0  
LB 0.30 Hz  
GB 0  
PC 1.00

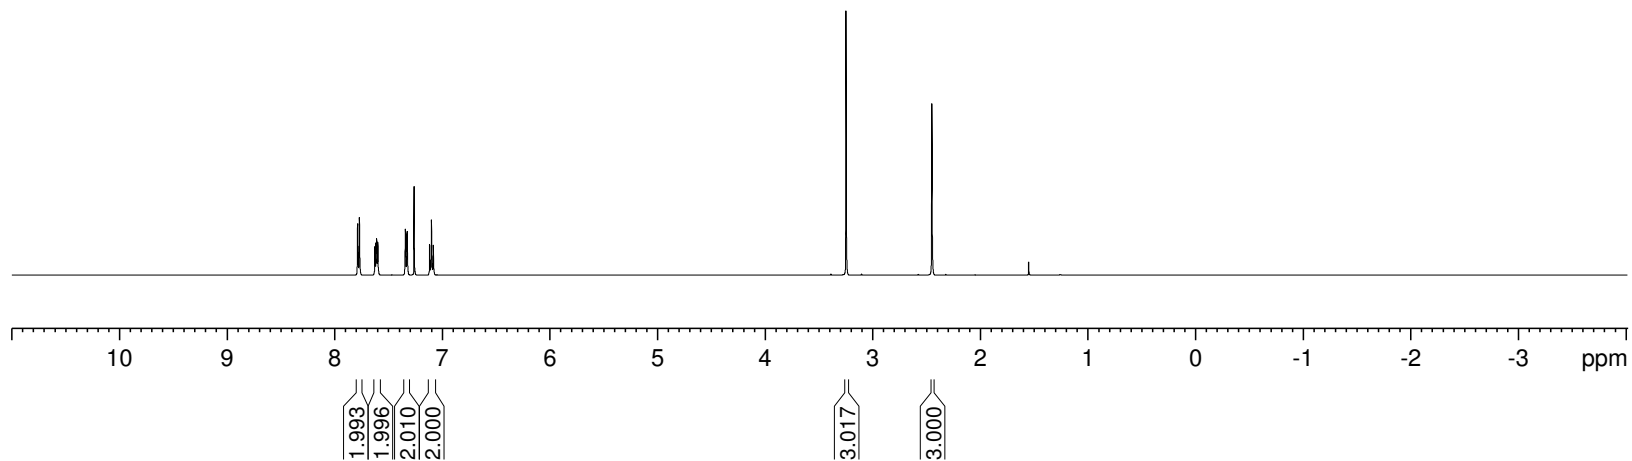

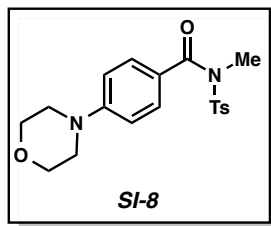

7.847  
7.830  
7.640  
7.623  
7.333  
7.316  
6.854  
6.837

3.861  
3.851  
3.842  
3.303  
3.294  
3.284  
3.212  
2.435

Current Data Parameters  
 NAME BJS-2-paraMorpholineNMeI  
 EXPNO 1  
 PROCNO 1

F2 - Acquisition Parameters  
 Date\_ 20151122  
 Time 14.35  
 INSTRUM av500  
 PROBHD 5 mm DCH 13C-1  
 PULPROG zg30  
 TD 65536  
 SOLVENT CDCl3  
 NS 8  
 DS 0  
 SWH 10000.000 Hz  
 FIDRES 0.152588 Hz  
 AQ 3.2767999 sec  
 RG 12.14  
 DW 50.000 usec  
 DE 10.00 usec  
 TE 298.0 K  
 D1 2.00000000 sec  
 TDO 1

===== CHANNEL f1 =====  
 SFO1 500.1330008 MHz  
 NUC1 1H  
 P1 10.00 usec  
 PLW1 13.50000000 W

F2 - Processing parameters  
 SI 65536  
 SF 500.1300126 MHz  
 WDW EM  
 SSB 0  
 LB 0.30 Hz  
 GB 0  
 PC 1.00

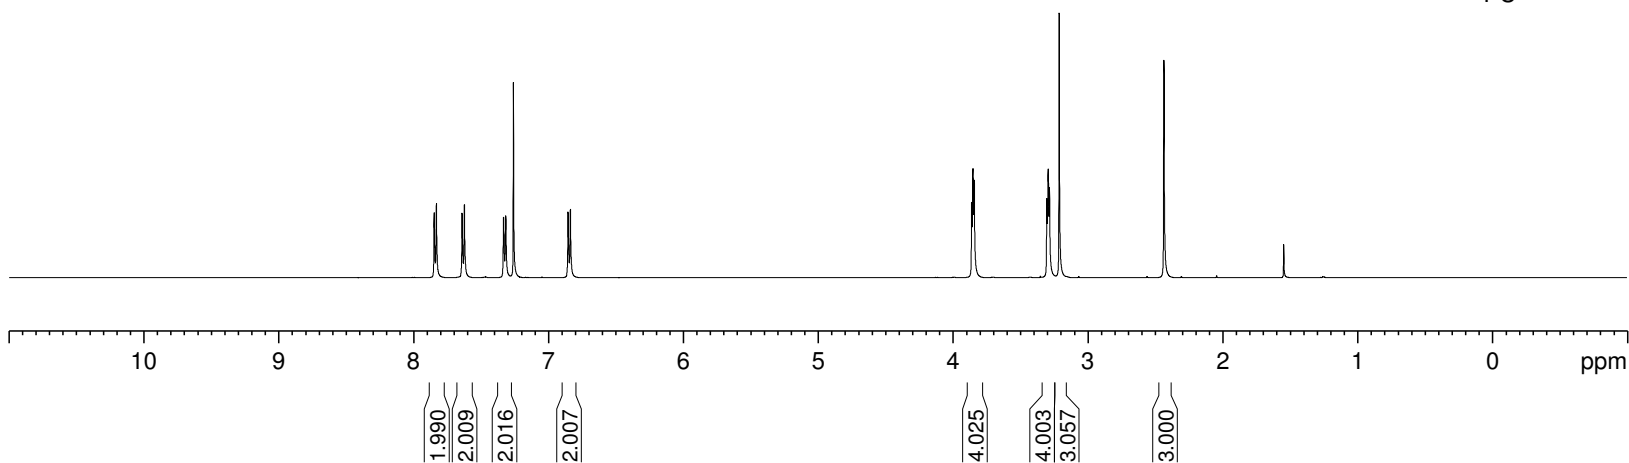

8.077  
8.073  
8.060  
8.056  
7.976  
7.960  
7.902  
7.884  
7.865  
7.621  
7.618  
7.607  
7.604  
7.602  
7.591  
7.588  
7.572  
7.569  
7.558  
7.555  
7.553  
7.542  
7.539  
7.357  
7.346  
7.341  
7.333  
7.329  
7.320  
7.316  
7.275  
7.271  
7.252  
7.245  
4.424

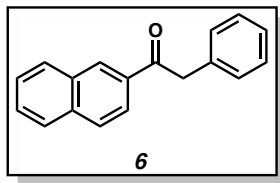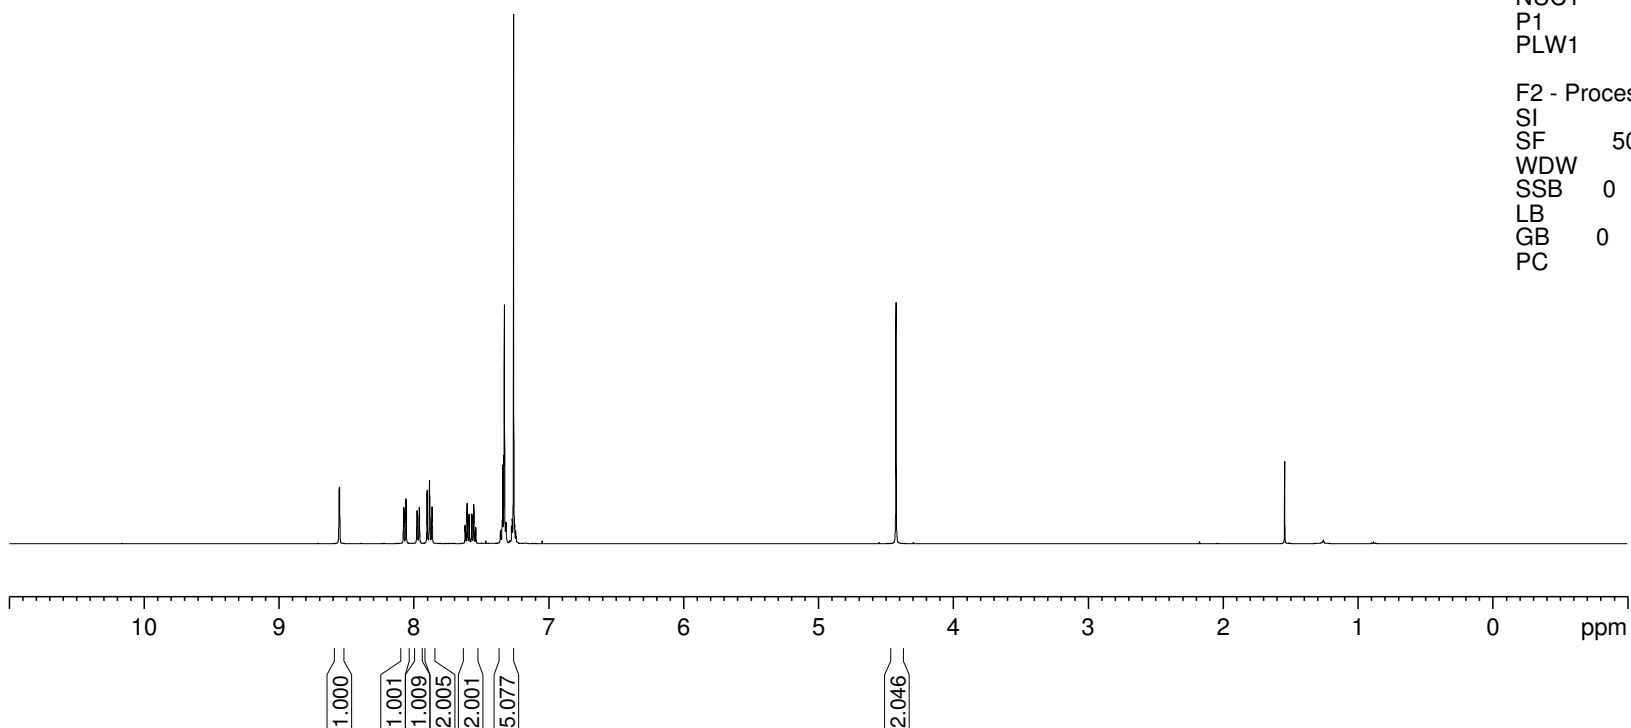

Current Data Parameters  
NAME NAW-4-228p  
EXPNO 8  
PROCNO 1

F2 - Acquisition Parameters  
Date\_ 20160127  
Time 13:55  
INSTRUM av500  
PROBHD 5 mm DCH 13C-1  
PULPROG zg30  
TD 65536  
SOLVENT CDCl3  
NS 8  
DS 0  
SWH 10000.000 Hz  
FIDRES 0.152588 Hz  
AQ 3.2767999 sec  
RG 12.14  
DW 50.000 usec  
DE 10.00 usec  
TE 298.0 K  
D1 2.00000000 sec  
TD0 1

===== CHANNEL f1 =====  
SFO1 500.1330008 MHz  
NUC1 1H  
P1 10.00 usec  
PLW1 13.50000000 W

F2 - Processing parameters  
SI 65536  
SF 500.1300122 MHz  
WDW EM  
SSB 0  
LB 0.30 Hz  
GB 0  
PC 1.00

8.007  
8.003  
8.000  
7.600  
7.598  
7.595  
7.587  
7.583  
7.579  
7.571  
7.568  
7.565  
7.503  
7.499  
7.496  
7.486  
7.484  
7.481  
7.472  
7.469  
7.468  
7.348  
7.347  
7.343  
7.333  
7.331  
7.323  
7.317  
7.316  
7.313  
7.273  
7.271  
7.261  
7.257  
7.246  
4.298

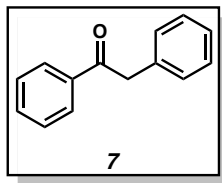

Current Data Parameters  
NAME BJS-2-220-92-95-2  
EXPNO 1  
PROCNO 1

F2 - Acquisition Parameters  
Date\_ 20151216  
Time\_ 9.20  
INSTRUM av500  
PROBHD 5 mm DCH 13C-1  
PULPROG zg30  
TD 65536  
SOLVENT CD2Cl2  
NS 8  
DS 0  
SWH 10000.000 Hz  
FIDRES 0.152588 Hz  
AQ 3.2767999 sec  
RG 12.14  
DW 50.000 usec  
DE 10.00 usec  
TE 298.0 K  
D1 2.00000000 sec  
TD0 1

===== CHANNEL f1 =====  
SFO1 500.1330008 MHz  
NUC1 1H  
P1 10.00 usec  
PLW1 13.50000000 W

F2 - Processing parameters  
SI 65536  
SF 500.1300193 MHz  
WDW EM  
SSB 0  
LB 0.30 Hz  
GB 0  
PC 1.00

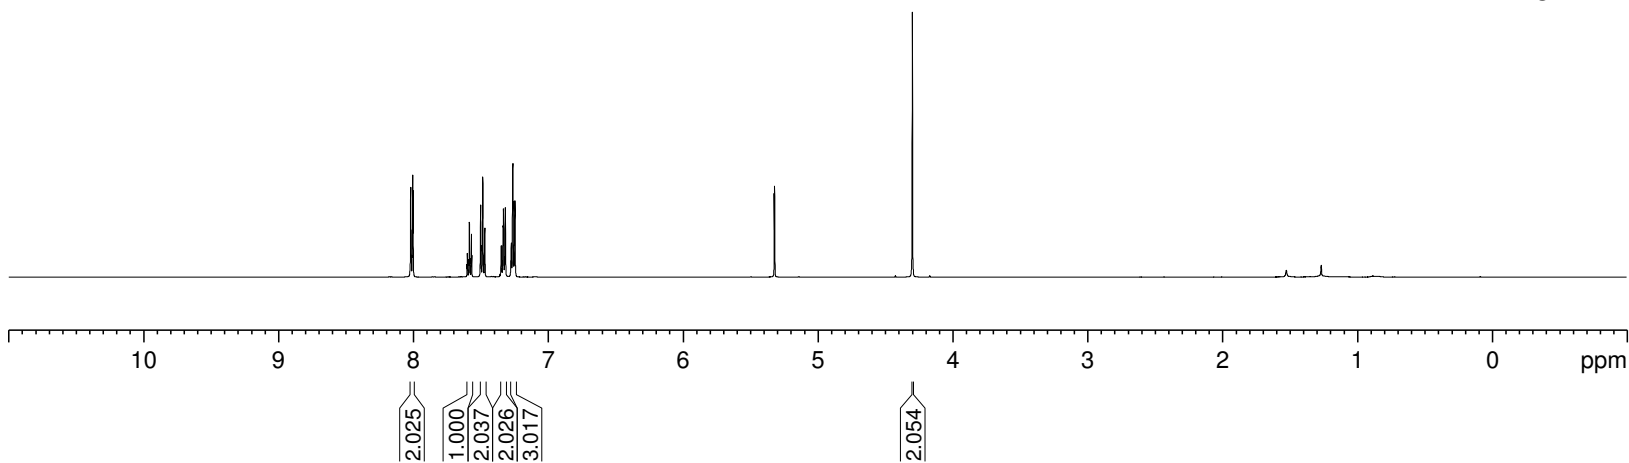

8.016  
8.010  
8.006  
7.996  
7.992  
7.986  
7.350  
7.348  
7.345  
7.338  
7.333  
7.331  
7.325  
7.318  
7.315  
7.272  
7.270  
7.270  
7.264  
7.262  
7.258  
7.255  
7.253  
7.252  
7.246  
7.243  
6.976  
6.970  
6.966  
6.956  
6.952  
6.946  
4.245  
3.863

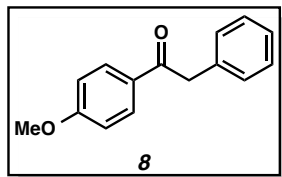

Current Data Parameters  
NAME BJS-2-223-PREP2  
EXPNO 1  
PROCNO 1

F2 - Acquisition Parameters  
Date\_ 20151217  
Time\_ 17.05  
INSTRUM av500  
PROBHD 5 mm DCH 13C-1  
PULPROG zg30  
TD 65536  
SOLVENT CD2Cl2  
NS 8  
DS 0  
SWH 10000.000 Hz  
FIDRES 0.152588 Hz  
AQ 3.2767999 sec  
RG 12.14  
DW 50.000 usec  
DE 10.00 usec  
TE 298.0 K  
D1 2.00000000 sec  
TD0 1

===== CHANNEL f1 =====  
SFO1 500.1330008 MHz  
NUC1 1H  
P1 10.00 usec  
PLW1 13.50000000 W

F2 - Processing parameters  
SI 65536  
SF 500.1300191 MHz  
WDW EM  
SSB 0  
LB 0.30 Hz  
GB 0  
PC 1.00

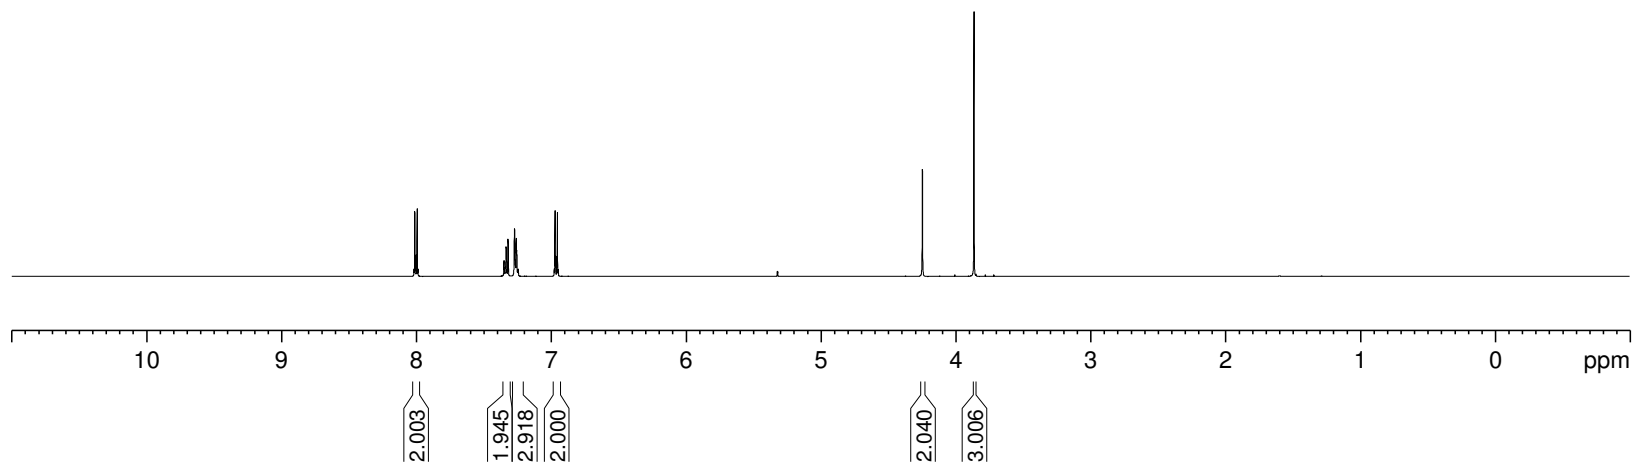



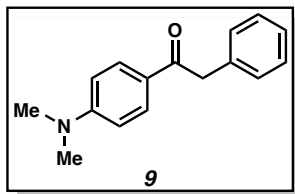

7.901  
7.883  
7.317  
7.302  
7.287  
7.261  
7.247  
7.234  
7.220  
7.205  
6.721  
6.703

4.193

3.023

Current Data Parameters  
 NAME BJS-2-244-COLUMN3  
 EXPNO 1  
 PROCNO 1

F2 - Acquisition Parameters  
 Date\_ 20160126  
 Time\_ 18.50  
 INSTRUM drx500  
 PROBHD 5 mm bb-Z Z800  
 PULPROG zg30  
 TD 65536  
 SOLVENT CD3CN  
 NS 8  
 DS 0  
 SWH 10000.000 Hz  
 FIDRES 0.152588 Hz  
 AQ 3.2767999 sec  
 RG 161.3  
 DW 50.000 usec  
 DE 6.00 usec  
 TE 296.9 K  
 D1 2.00000000 sec  
 TD0 1

===== CHANNEL f1 =====  
 NUC1 1H  
 P1 13.30 usec  
 PL1 0 dB  
 SFO1 500.3330020 MHz

F2 - Processing parameters  
 SI 32768  
 SF 500.3300140 MHz  
 WDW EM  
 SSB 0  
 LB 0.90 Hz  
 GB 0  
 PC 1.00

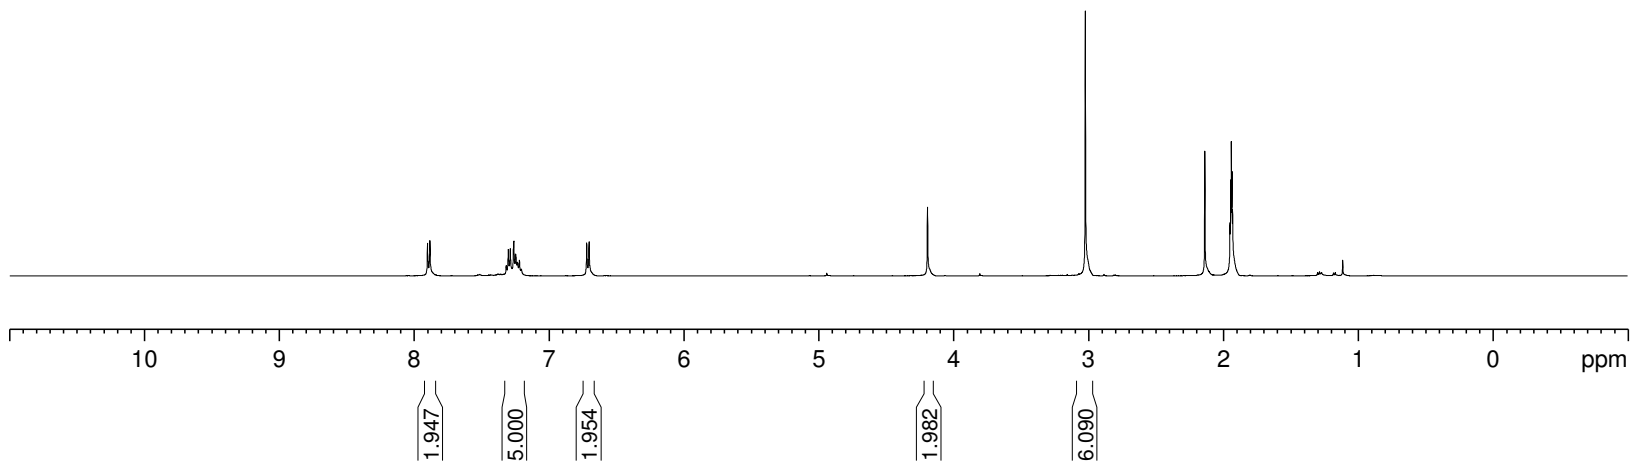

7.921  
7.917  
7.907  
7.903  
7.313  
7.298  
7.287  
7.283  
7.252  
7.249  
7.244  
7.235  
7.234  
7.222  
7.218  
6.931  
6.926  
6.917  
6.912

4.214  
3.762  
3.753  
3.743  
3.276  
3.266  
3.257

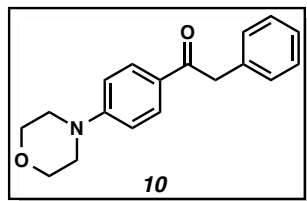

Current Data Parameters  
NAME JED-1-164-CHLORO  
EXPNO 1  
PROCNO 1

F2 - Acquisition Parameters  
Date\_ 20160106  
Time\_ 15.59  
INSTRUM av500  
PROBHD 5 mm DCH 13C-1  
PULPROG zg30  
TD 65536  
SOLVENT CD3CN  
NS 8  
DS 0  
SWH 10000.000 Hz  
FIDRES 0.152588 Hz  
AQ 3.2767999 sec  
RG 12.14  
DW 50.000 usec  
DE 10.00 usec  
TE 298.0 K  
D1 2.00000000 sec  
TD0 1

===== CHANNEL f1 =====  
SFO1 500.1330008 MHz  
NUC1 1H  
P1 10.00 usec  
PLW1 13.50000000 W

F2 - Processing parameters  
SI 65536  
SF 500.1300192 MHz  
WDW EM  
SSB 0  
LB 0.30 Hz  
GB 0  
PC 1.00

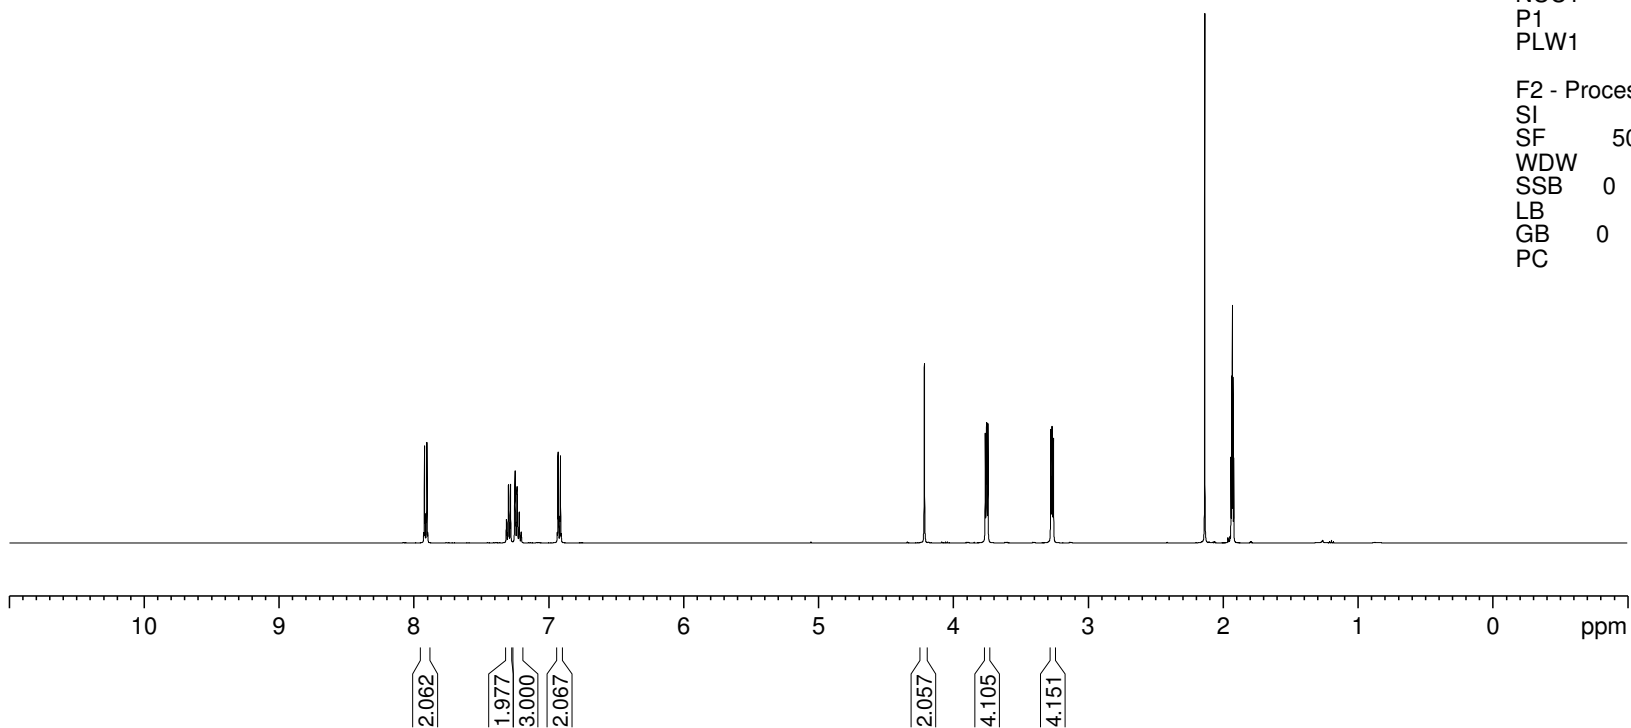

8.100  
8.096  
8.089  
8.087  
8.085  
8.082  
8.076  
8.071  
7.345  
7.331  
7.330  
7.328  
7.324  
7.315  
7.270  
7.265  
7.260  
7.259  
7.256  
7.253  
7.249  
7.247  
7.243  
7.234  
7.230  
7.225  
7.216  
7.212  
4.325

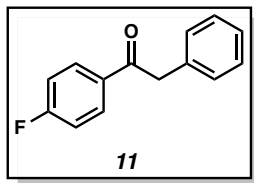

Current Data Parameters  
NAME BJS-2-225-CHLORO3  
EXPNO 1  
PROCNO 1

F2 - Acquisition Parameters  
Date\_ 20160108  
Time\_ 13.17  
INSTRUM av500  
PROBHD 5 mm DCH 13C-1  
PULPROG zg30  
TD 65536  
SOLVENT CD3CN  
NS 8  
DS 0  
SWH 10000.000 Hz  
FIDRES 0.152588 Hz  
AQ 3.2767999 sec  
RG 12.14  
DW 50.000 usec  
DE 10.00 usec  
TE 298.0 K  
D1 2.00000000 sec  
TD0 1

===== CHANNEL f1 =====  
SFO1 500.1330008 MHz  
NUC1 1H  
P1 10.00 usec  
PLW1 13.50000000 W

F2 - Processing parameters  
SI 65536  
SF 500.1300142 MHz  
WDW EM  
SSB 0  
LB 0.30 Hz  
GB 0  
PC 1.00

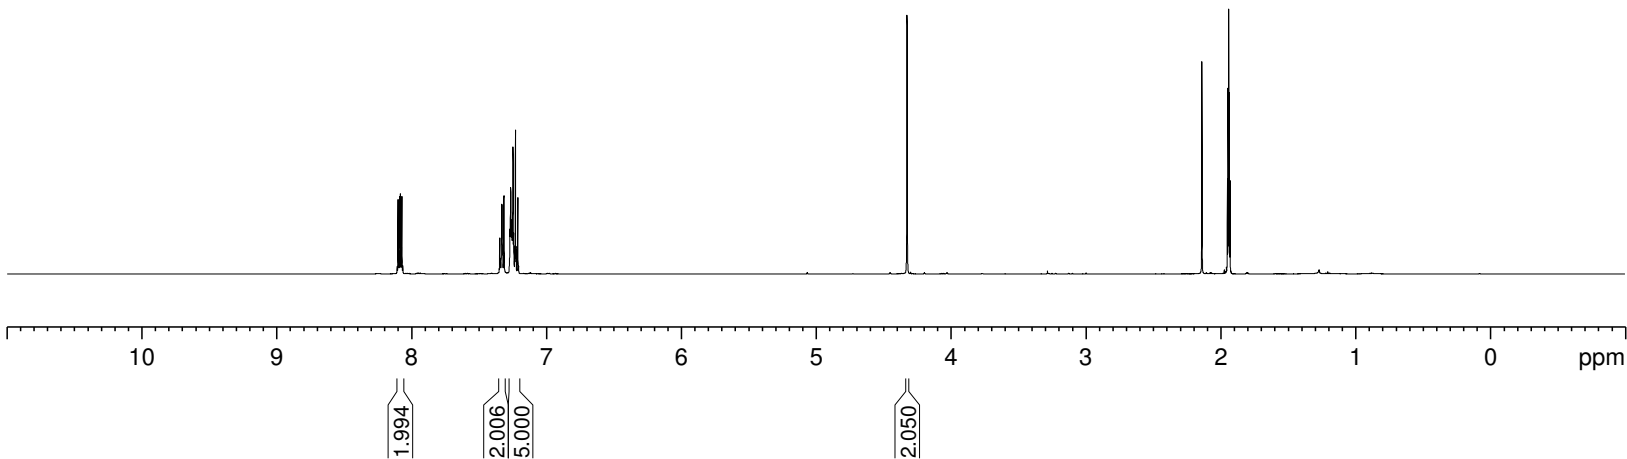

8.113  
8.097  
7.729  
7.713  
7.357  
7.343  
7.328  
7.288  
7.286  
7.273  
7.269  
7.266  
7.252

4.309

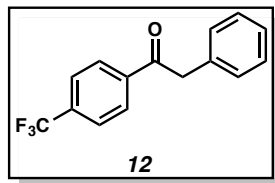

Current Data Parameters  
NAME NAW-4-225p  
EXPNO 3  
PROCNO 1

F2 - Acquisition Parameters  
Date\_ 20160115  
Time 10.16  
INSTRUM av500  
PROBHD 5 mm DCH 13C-1  
PULPROG zg30  
TD 65536  
SOLVENT CDCl3  
NS 8  
DS 0  
SWH 10000.000 Hz  
FIDRES 0.152588 Hz  
AQ 3.2767999 sec  
RG 12.14  
DW 50.000 usec  
DE 10.00 usec  
TE 298.0 K  
D1 2.00000000 sec  
TD0 1

===== CHANNEL f1 =====  
SFO1 500.1330008 MHz  
NUC1 1H  
P1 10.00 usec  
PLW1 13.50000000 W

F2 - Processing parameters  
SI 65536  
SF 500.1300122 MHz  
WDW EM  
SSB 0  
LB 0.30 Hz  
GB 0  
PC 1.00

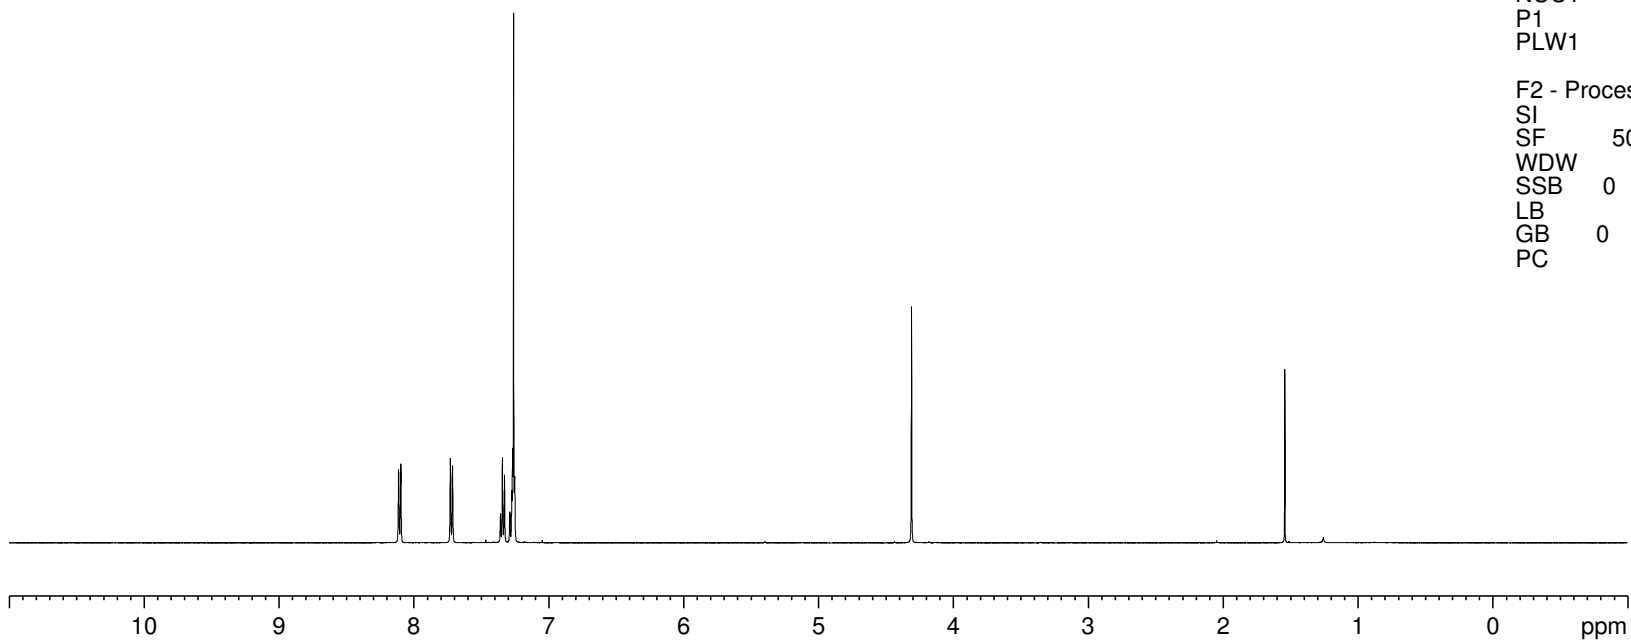

2.001  
2.000  
2.008  
3.026

2.047

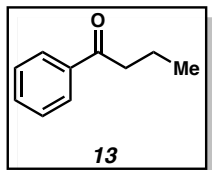

7.971  
7.956  
7.568  
7.553  
7.538  
7.475  
7.459  
7.444

2.967  
2.952  
2.938  
1.814  
1.799  
1.784  
1.770  
1.755  
1.740  
1.024  
1.009  
0.995

Current Data Parameters  
 NAME BJS-2-194-PREP2  
 EXPNO 1  
 PROCNO 1

F2 - Acquisition Parameters  
 Date\_ 20151201  
 Time 17.48  
 INSTRUM drx500  
 PROBHD 5 mm bb-Z Z800  
 PULPROG zg30  
 TD 65536  
 SOLVENT CDCl3  
 NS 8  
 DS 0  
 SWH 10000.000 Hz  
 FIDRES 0.152588 Hz  
 AQ 3.2767999 sec  
 RG 161.3  
 DW 50.000 usec  
 DE 6.00 usec  
 TE 297.0 K  
 D1 2.0000000 sec  
 TD0 1

===== CHANNEL f1 =====  
 NUC1 1H  
 P1 13.30 usec  
 PL1 0 dB  
 SFO1 500.3330020 MHz

F2 - Processing parameters  
 SI 32768  
 SF 500.3300221 MHz  
 WDW EM  
 SSB 0  
 LB 1.00 Hz  
 GB 0  
 PC 1.00

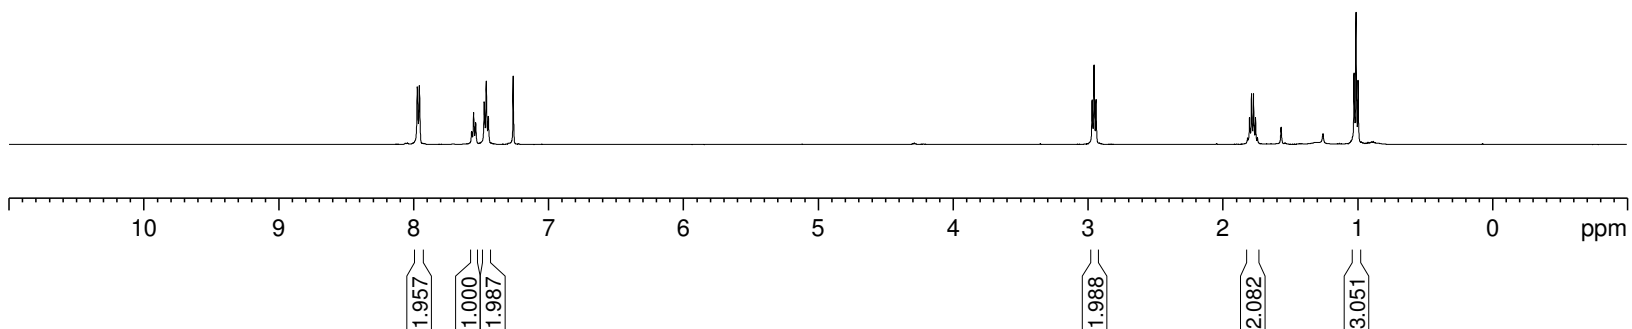

8.444  
8.036  
8.033  
8.019  
8.016  
7.981  
7.965  
7.898  
7.882  
7.868  
7.612  
7.609  
7.598  
7.596  
7.593  
7.582  
7.579  
7.568  
7.565  
7.554  
7.552  
7.549  
7.538  
7.535

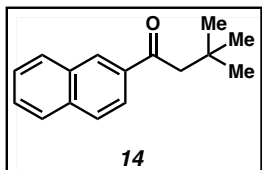

2.997

1.107

Current Data Parameters  
NAME NAW-4-210p  
EXPNO 1  
PROCNO 1

F2 - Acquisition Parameters  
Date\_ 20151130  
Time 10.52  
INSTRUM av500  
PROBHD 5 mm DCH 13C-1  
PULPROG zg30  
TD 65536  
SOLVENT CDCl3  
NS 8  
DS 0  
SWH 10000.000 Hz  
FIDRES 0.152588 Hz  
AQ 3.2767999 sec  
RG 12.14  
DW 50.000 usec  
DE 10.00 usec  
TE 298.0 K  
D1 2.00000000 sec  
TD0 1

===== CHANNEL f1 =====

SFO1 500.1330008 MHz  
NUC1 1H  
P1 10.00 usec  
PLW1 13.50000000 W

F2 - Processing parameters  
SI 65536  
SF 500.1300122 MHz  
WDW EM  
SSB 0  
LB 1.00 Hz  
GB 0  
PC 1.00

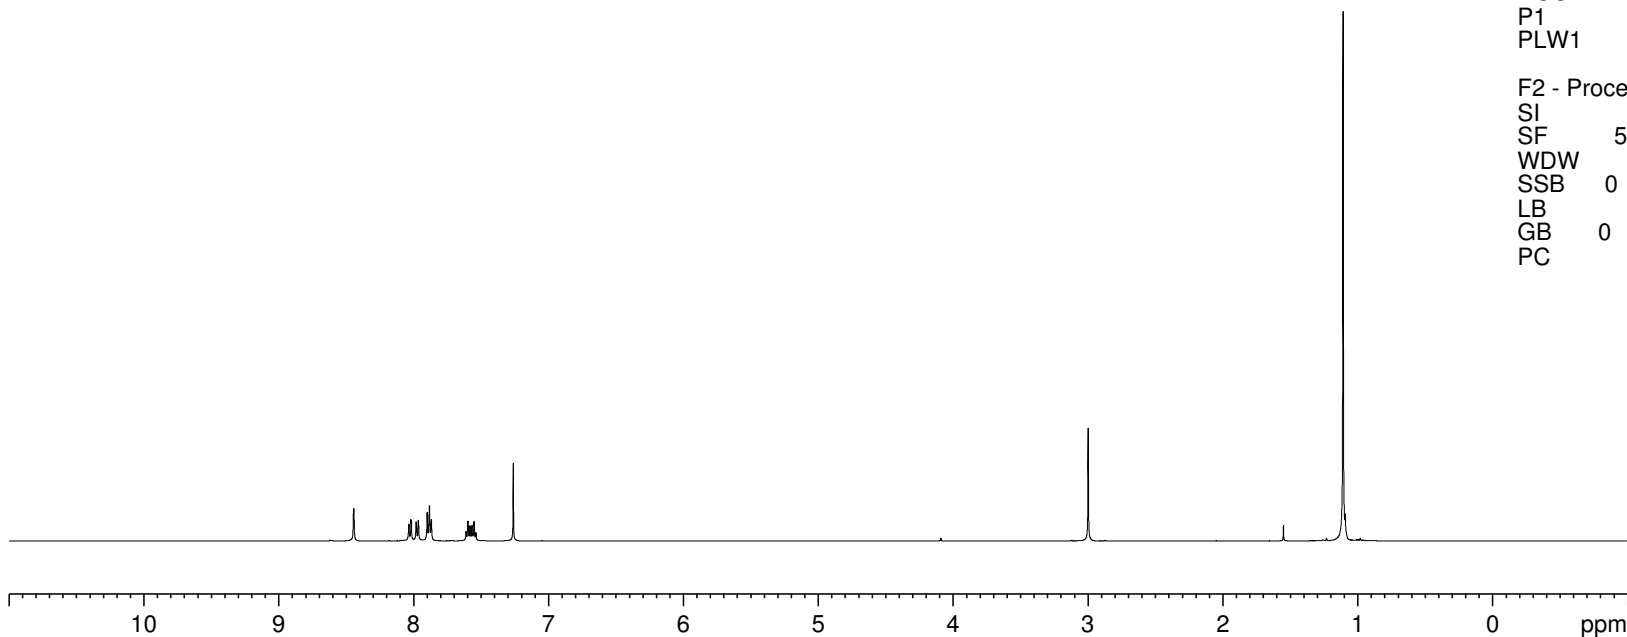

0.997  
1.020  
1.063  
2.056  
2.043

2.020

9.000

8.477  
8.045  
8.042  
8.028  
8.025  
7.979  
7.963  
7.916  
7.898  
7.890  
7.874  
7.616  
7.614  
7.600  
7.586  
7.584  
7.570  
7.568  
7.554  
7.540  
7.538

3.778  
3.765  
3.751  
3.737  
3.724  
3.710  
3.696

1.292  
1.278

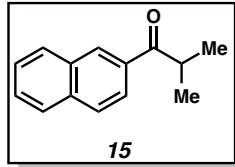

Current Data Parameters  
NAME NAW-4-203p  
EXPNO 5  
PROCNO 1

F2 - Acquisition Parameters  
Date\_ 20151125  
Time 13.02  
INSTRUM av500  
PROBHD 5 mm DCH 13C-1  
PULPROG zg30  
TD 65536  
SOLVENT CDCl3  
NS 8  
DS 0  
SWH 10000.000 Hz  
FIDRES 0.152588 Hz  
AQ 3.2767999 sec  
RG 12.14  
DW 50.000 usec  
DE 10.00 usec  
TE 298.0 K  
D1 2.00000000 sec  
TD0 1

===== CHANNEL f1 =====  
SFO1 500.1330008 MHz  
NUC1 1H  
P1 10.00 usec  
PLW1 13.50000000 W

F2 - Processing parameters  
SI 65536  
SF 500.1300122 MHz  
WDW EM  
SSB 0  
LB 1.00 Hz  
GB 0  
PC 1.00

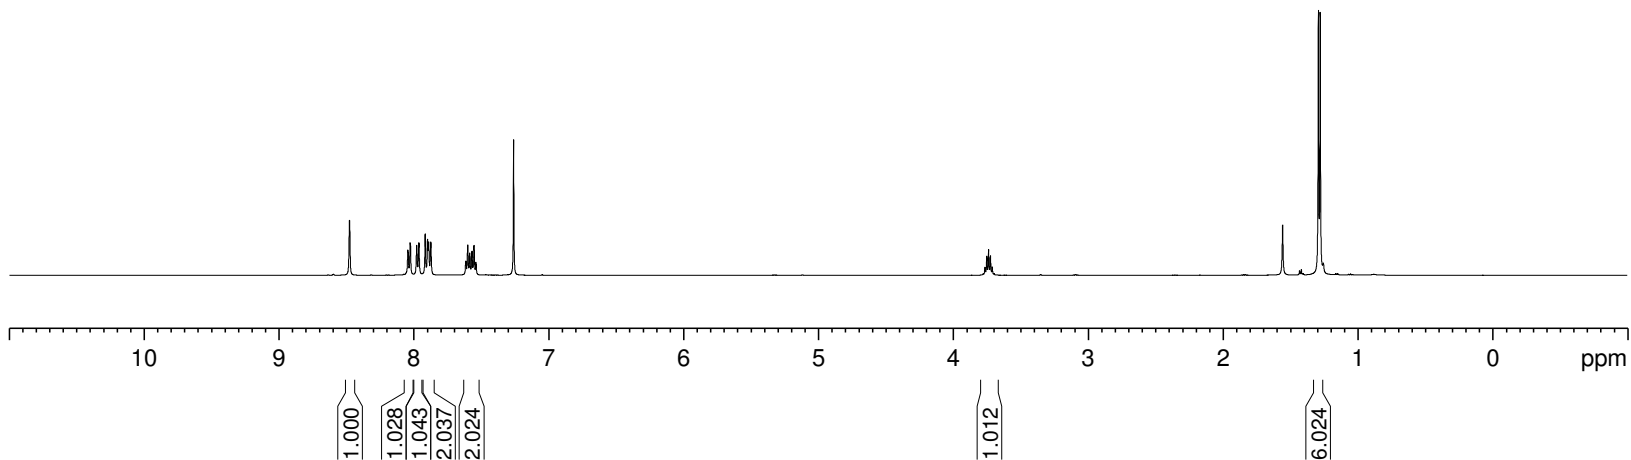

8.349  
8.139  
8.135  
8.122  
8.118  
7.636  
7.621  
7.571  
7.553  
7.537  
7.521  
7.260  
7.257  
7.246  
7.244  
7.231  
7.228  
7.225  
7.212  
7.209  
7.198  
7.195

3.250  
3.236  
3.223  
3.209  
3.196  
3.182  
1.923  
1.908  
1.895  
1.881  
1.867  
1.853  
1.838  
1.474  
1.459  
1.446  
1.444  
1.432  
1.418  
1.417  
1.404  
1.389  
1.147  
1.134  
0.849  
0.834

Current Data Parameters  
NAME NAW-4-206-4-1-2  
EXPNO 1  
PROCNO 1

F2 - Acquisition Parameters  
Date\_ 20160114  
Time 14.22  
INSTRUM av500  
PROBHD 5 mm DCH 13C-1  
PULPROG zg30  
TD 65536  
SOLVENT C6D6  
NS 8  
DS 0  
SWH 10000.000 Hz  
FIDRES 0.152588 Hz  
AQ 3.2767999 sec  
RG 12.14  
DW 50.000 usec  
DE 10.00 usec  
TE 298.0 K  
D1 2.0000000 sec  
TD0 1

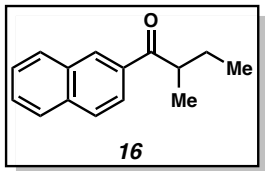

==== CHANNEL f1 ====  
SFO1 500.1330008 MHz  
NUC1 1H  
P1 10.00 usec  
PLW1 13.5000000 W

F2 - Processing parameters  
SI 65536  
SF 500.1299958 MHz  
WDW EM  
SSB 0  
LB 0.30 Hz  
GB 0  
PC 1.00

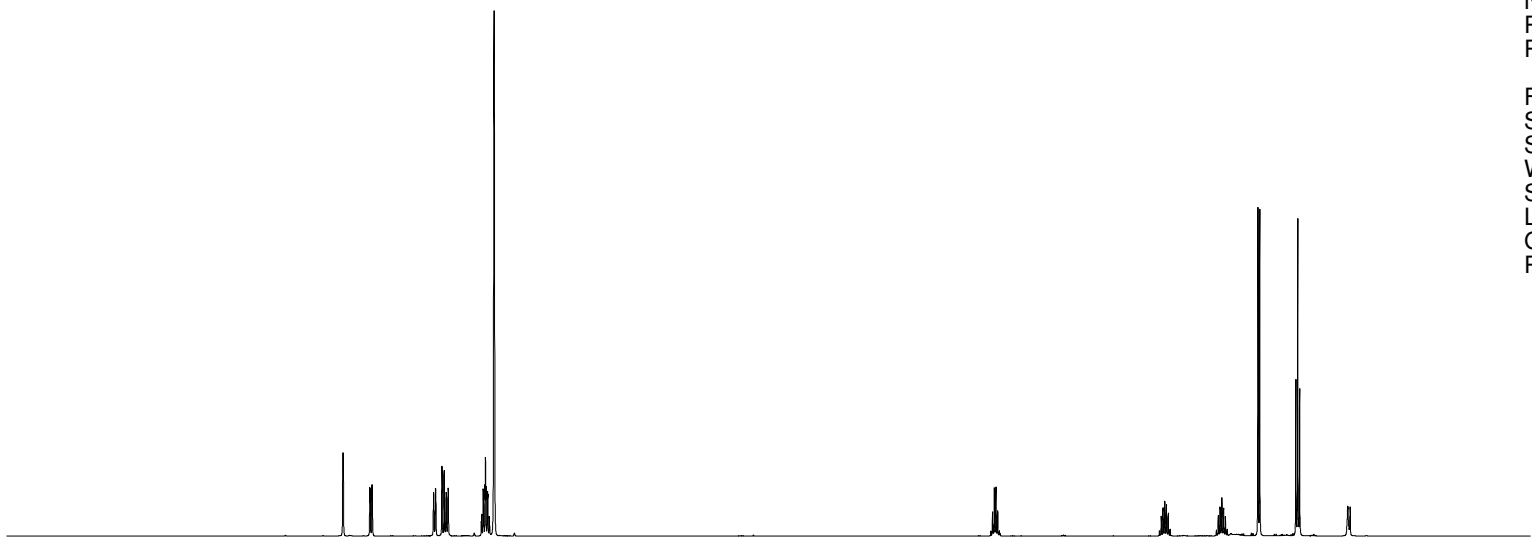

10 9 8 7 6 5 4 3 2 1 0 ppm

1.000  
0.994  
0.990  
1.020  
1.010  
2.024

1.035

1.028  
1.070  
3.070  
3.108



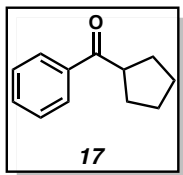

7.985  
7.970  
7.561  
7.546  
7.532  
7.476  
7.461  
7.445

3.752  
3.736  
3.720  
3.705  
3.689  
1.944  
1.931  
1.917  
1.906  
1.746  
1.736  
1.723  
1.710  
1.704  
1.692  
1.673  
1.659  
1.651

Current Data Parameters  
NAME NAW-4-219p  
EXPNO 10  
PROCNO 1

F2 - Acquisition Parameters  
Date\_ 20160126  
Time 17.23  
INSTRUM drx500  
PROBHD 5 mm bb-Z Z800  
PULPROG zg30  
TD 65536  
SOLVENT CDCl3  
NS 40  
DS 0  
SWH 10000.000 Hz  
FIDRES 0.152588 Hz  
AQ 3.2767999 sec  
RG 256  
DW 50.000 usec  
DE 6.00 usec  
TE 296.8 K  
D1 2.00000000 sec  
TD0 1

===== CHANNEL f1 =====  
NUC1 1H  
P1 13.30 usec  
PL1 0 dB  
SFO1 500.3330020 MHz

F2 - Processing parameters  
SI 32768  
SF 500.3300219 MHz  
WDW EM  
SSB 0  
LB 1.00 Hz  
GB 0  
PC 1.00

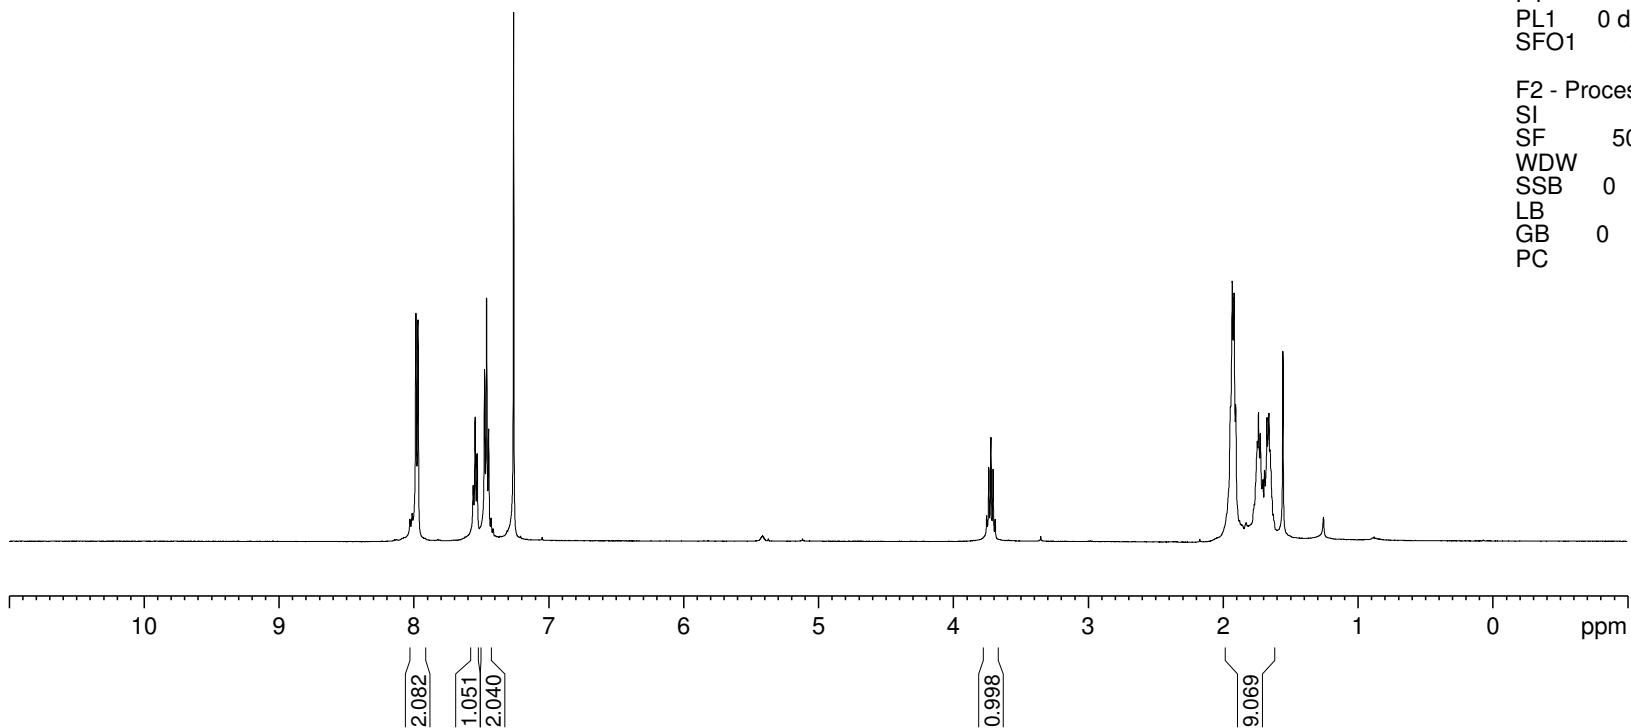

7.953  
7.951  
7.940  
7.937  
7.934  
7.558  
7.548  
7.544  
7.540  
7.532  
7.529  
7.526  
7.477  
7.473  
7.470  
7.460  
7.458  
7.446  
7.443  
7.442  
3.287  
3.271  
3.264  
3.258  
3.242  
1.910  
1.905  
1.881  
1.878  
1.874  
1.868  
1.861  
1.854  
1.849  
1.847  
1.842  
1.835  
1.829  
1.756  
1.753  
1.730  
1.727  
1.514  
1.509  
1.491  
1.486  
1.465  
1.433  
1.414  
1.408  
1.402  
1.389  
1.382  
1.376  
1.357  
1.310  
1.285  
1.260

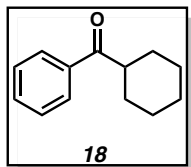

Current Data Parameters  
NAME JED-1-144p  
EXPNO 1  
PROCNO 1

F2 - Acquisition Parameters  
Date\_ 20151129  
Time 10.33  
INSTRUM av500  
PROBHD 5 mm DCH 13C-1  
PULPROG zg30  
TD 65536  
SOLVENT CDCl3  
NS 8  
DS 0  
SWH 10000.000 Hz  
FIDRES 0.152588 Hz  
AQ 3.2767999 sec  
RG 12.14  
DW 50.000 usec  
DE 10.00 usec  
TE 298.0 K  
D1 2.00000000 sec  
TD0 1

==== CHANNEL f1 =====  
SFO1 500.1330008 MHz  
NUC1 1H  
P1 10.00 usec  
PLW1 13.50000000 W

F2 - Processing parameters  
SI 65536  
SF 500.1300120 MHz  
WDW EM  
SSB 0  
LB 0.30 Hz  
GB 0  
PC 1.00

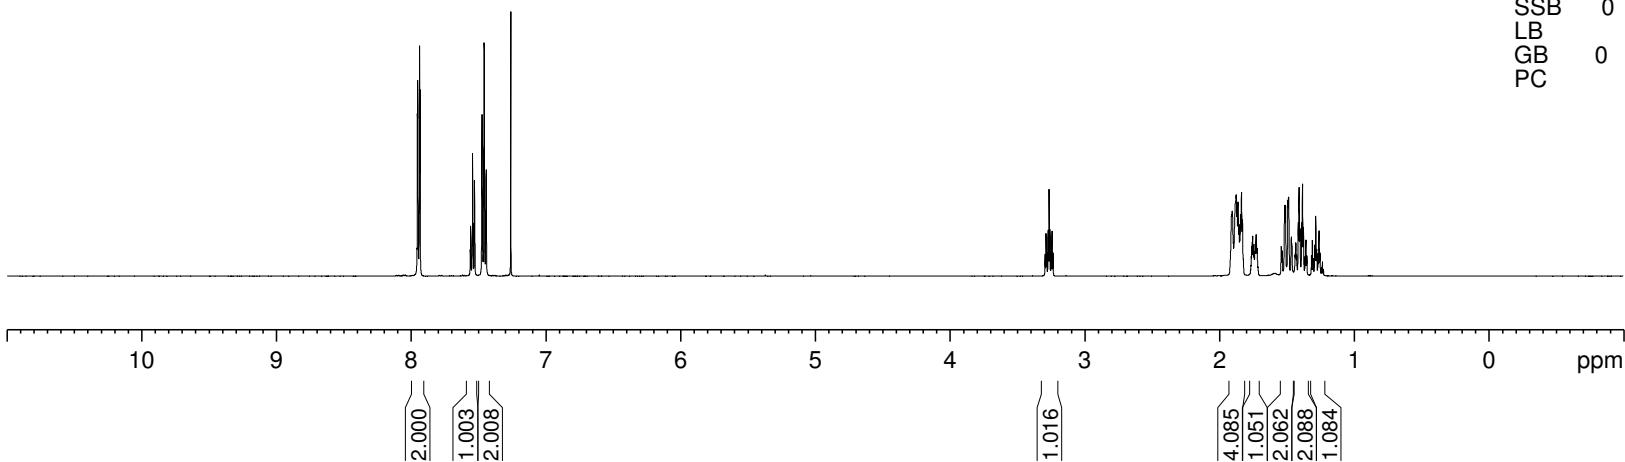

8.127  
8.124  
8.120  
8.111  
8.107  
8.104  
7.986  
7.983  
7.980  
7.970  
7.966  
7.963  
3.950  
3.280  
3.263  
3.257  
3.251  
3.235  
1.907  
1.904  
1.892  
1.875  
1.866  
1.859  
1.848  
1.841  
1.834  
1.765  
1.762  
1.759  
1.756  
1.752  
1.742  
1.740  
1.736  
1.733  
1.730  
1.727  
1.533  
1.507  
1.502  
1.479  
1.462  
1.459  
1.438  
1.431  
1.418  
1.413  
1.407  
1.394  
1.387  
1.381  
1.362  
1.310

===== CHANNEL f1 =====  
SFO1 500.1330008 MHz  
NUC1 1H  
P1 10.00 usec  
PLW1 13.5000000 W

===== CHANNEL f1 =====  
SFO1 500.1330008 MHz  
NUC1 1H  
P1 10.00 usec  
PLW1 13.5000000 W

F2 - Acquisition Parameters  
Date\_ 20151209  
Time 14.41  
INSTRUM av500  
PROBHD 5 mm DCH 13C-1  
PULPROG zg30  
TD 65536  
SOLVENT CDCl3  
NS 8  
DS 0  
SWH 10000.000 Hz  
FIDRES 0.152588 Hz  
AQ 3.2767999 sec  
RG 12.14  
DW 50.000 usec  
DE 10.00 usec  
TE 298.0 K  
D1 2.00000000 sec  
TD0 1

F2 - Processing parameters  
SI 65536  
SF 500.1300122 MHz  
WDW EM  
SSB 0  
LB 0.30 Hz  
GB 0  
PC 1.00

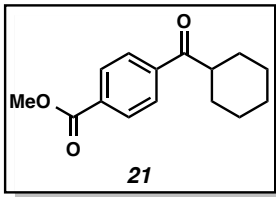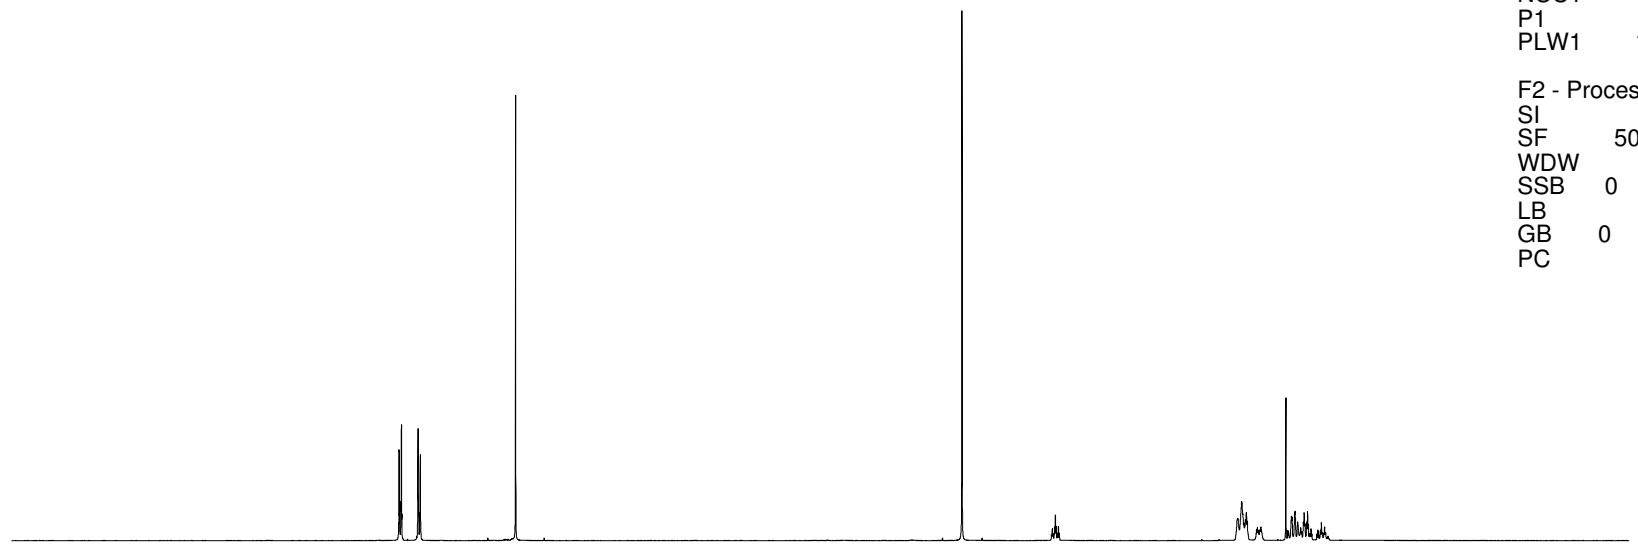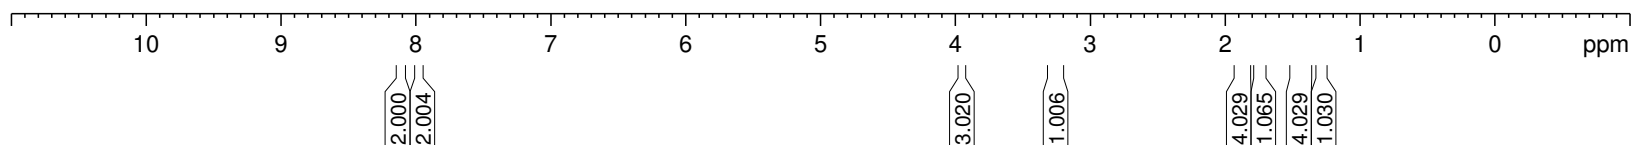

# $^{13}\text{C}$ NMR Spectra

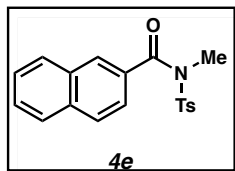

171.96  
 145.24  
 135.55  
 135.12  
 132.48  
 132.02  
 129.95  
 129.86  
 129.27  
 128.75  
 128.51  
 128.49  
 128.17  
 127.27  
 124.94

36.03

21.98

Current Data Parameters  
 NAME BJS-2-NMeNTsNaphthyl-Ca  
 EXPNO 1  
 PROCNO 1

F2 - Acquisition Parameters  
 Date\_ 20151124  
 Time 18.20  
 INSTRUM av500  
 PROBHD 5 mm DCH 13C-1  
 PULPROG zgpg30  
 TD 65536  
 SOLVENT CDCl3  
 NS 128  
 DS 2  
 SWH 31250.000 Hz  
 FIDRES 0.476837 Hz  
 AQ 1.0485760 sec  
 RG 13.13  
 DW 16.000 usec  
 DE 18.00 usec  
 TE 298.0 K  
 D1 2.00000000 sec  
 D11 0.03000000 sec  
 TD0 1

==== CHANNEL f1 =====  
 SFO1 125.7722511 MHz  
 NUC1 13C  
 P1 9.63 usec  
 PLW1 23.00000000 W

==== CHANNEL f2 =====  
 SFO2 500.1330008 MHz  
 NUC2 1H  
 CPDPRG[2] waltz16  
 PCPD2 80.00 usec  
 PLW2 13.50000000 W  
 PLW12 0.21094000 W  
 PLW13 0.13500001 W

F2 - Processing parameters  
 SI 131072  
 SF 125.7577523 MHz  
 WDW EM  
 SSB 0  
 LB 1.00 Hz  
 GB 0  
 PC 1.40

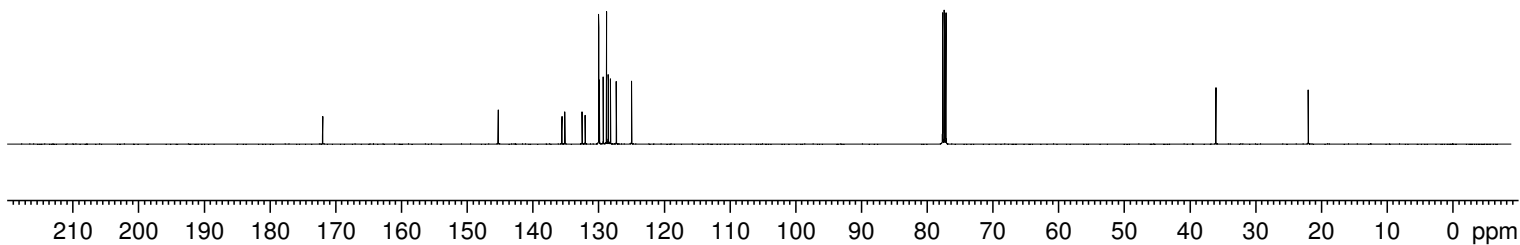

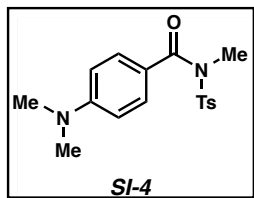

172.052  
 153.679  
 144.683  
 135.464  
 132.341  
 129.844  
 128.810  
 120.529  
 110.817

40.379  
 36.442

21.979

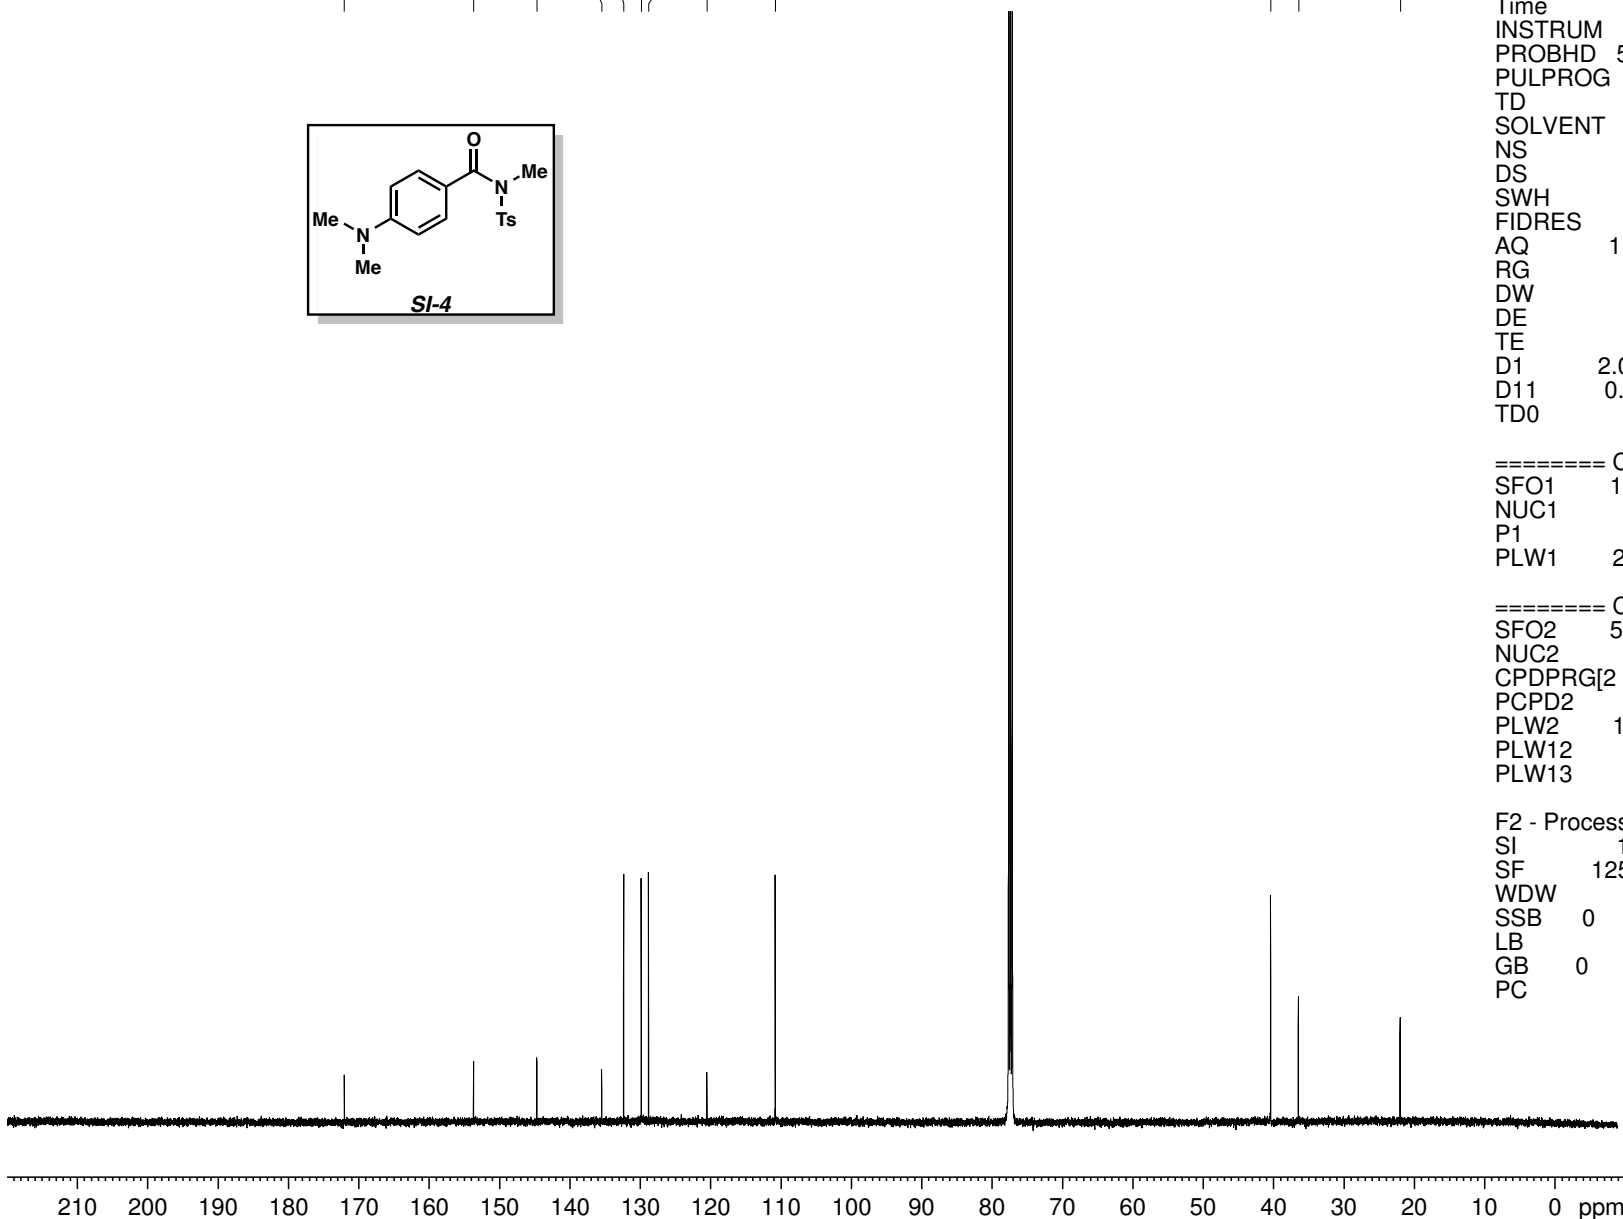

Current Data Parameters  
 NAME BJS-2-paraDimethylaminoN  
 EXPNO 1  
 PROCNO 1

F2 - Acquisition Parameters  
 Date\_ 20151122  
 Time 14.51  
 INSTRUM av500  
 PROBHD 5 mm DCH 13C-1  
 PULPROG zgpg30  
 TD 65536  
 SOLVENT CDCl3  
 NS 128  
 DS 2  
 SWH 31250.000 Hz  
 FIDRES 0.476837 Hz  
 AQ 1.0485760 sec  
 RG 12.14  
 DW 16.000 usec  
 DE 18.00 usec  
 TE 298.0 K  
 D1 2.00000000 sec  
 D11 0.03000000 sec  
 TDO 1

===== CHANNEL f1 =====  
 SFO1 125.7722511 MHz  
 NUC1 13C  
 P1 9.63 usec  
 PLW1 23.00000000 W

===== CHANNEL f2 =====  
 SFO2 500.1330008 MHz  
 NUC2 1H  
 CPDPRG[2] waltz16  
 PCPD2 80.00 usec  
 PLW2 13.50000000 W  
 PLW12 0.21094000 W  
 PLW13 0.13500001 W

F2 - Processing parameters  
 SI 131072  
 SF 125.7577467 MHz  
 WDW EM  
 SSB 0  
 LB 1.00 Hz  
 GB 0  
 PC 1.40

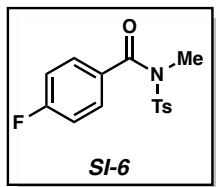

170.99  
166.32  
164.30  
  
145.39  
135.26  
131.72  
131.65  
131.08  
131.05  
130.06  
128.64  
115.90  
115.73

35.80

22.02

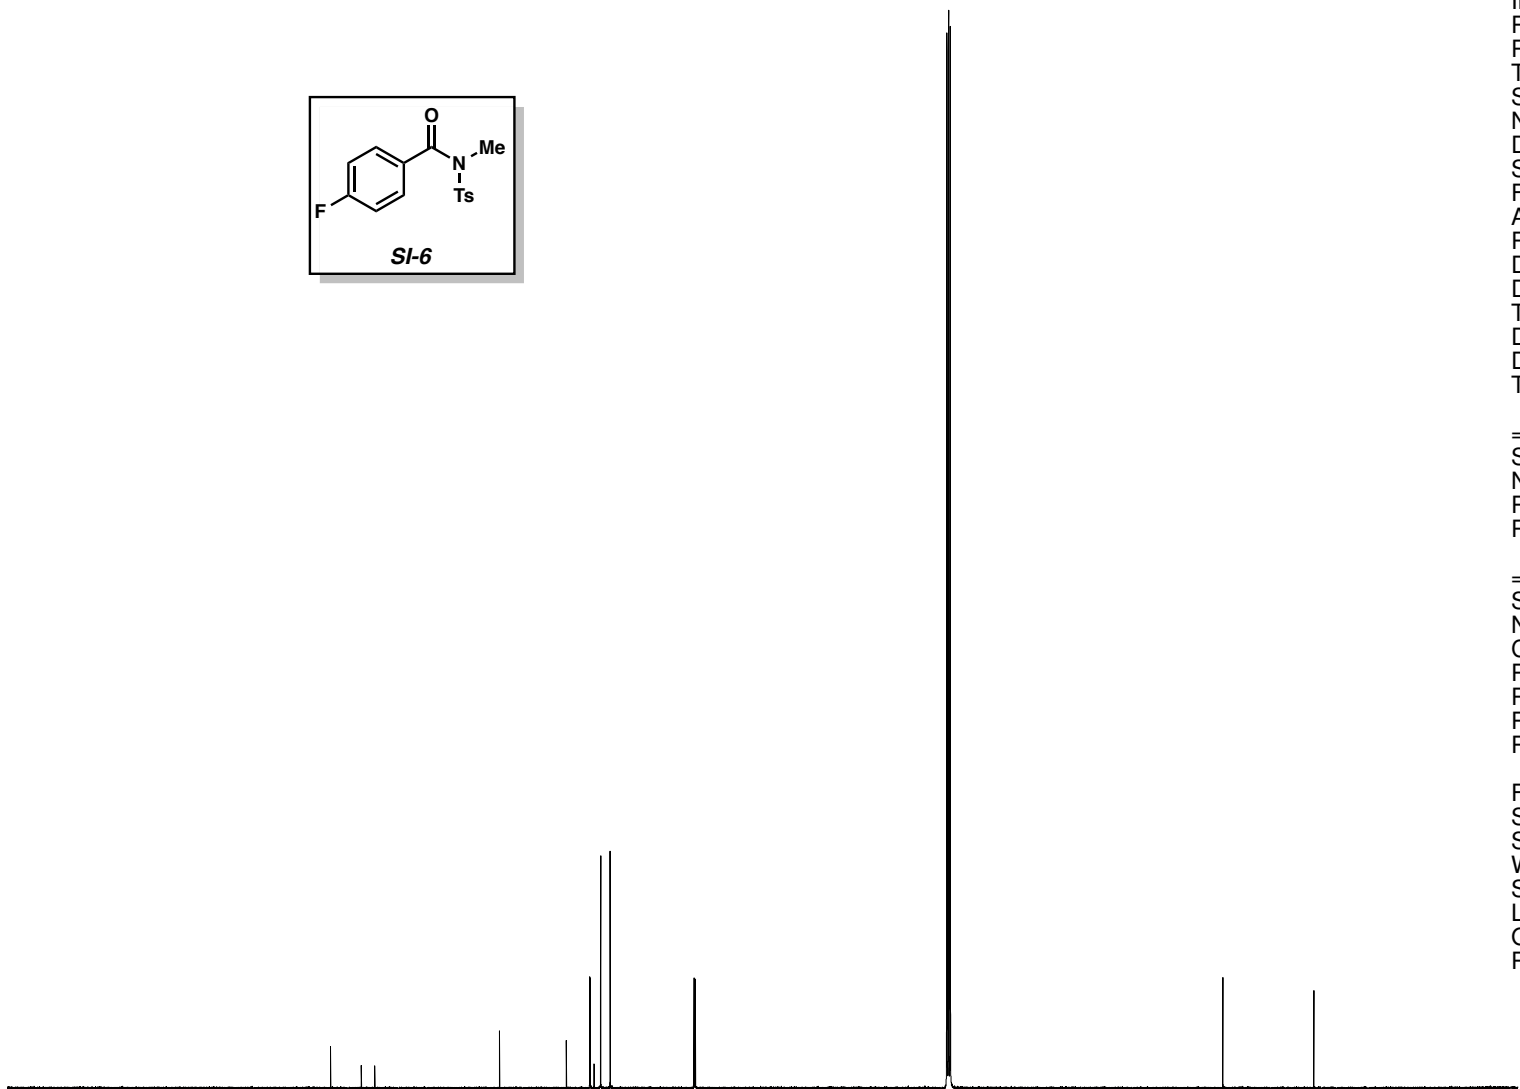

210 200 190 180 170 160 150 140 130 120 110 100 90 80 70 60 50 40 30 20 10 ppm

Current Data Parameters  
NAME BJS-2-paraFluoroNMeNTsE  
EXPNO 1  
PROCNO 1

F2 - Acquisition Parameters  
Date\_ 20151123  
Time 9.11  
INSTRUM av500  
PROBHD 5 mm DCH 13C-1  
PULPROG zgpg30  
TD 65536  
SOLVENT CDCl3  
NS 128  
DS 2  
SWH 31250.000 Hz  
FIDRES 0.476837 Hz  
AQ 1.0485760 sec  
RG 17.16  
DW 16.000 usec  
DE 18.00 usec  
TE 298.0 K  
D1 2.00000000 sec  
D11 0.03000000 sec  
TD0 1

==== CHANNEL f1 =====  
SFO1 125.7722511 MHz  
NUC1 13C  
P1 9.63 usec  
PLW1 23.00000000 W

==== CHANNEL f2 =====  
SFO2 500.1330008 MHz  
NUC2 1H  
CPDPRG[2] waltz16  
PCPD2 80.00 usec  
PLW2 13.50000000 W  
PLW12 0.21094000 W  
PLW13 0.13500001 W

F2 - Processing parameters  
SI 131072  
SF 125.7577471 MHz  
WDW EM  
SSB 0  
LB 1.00 Hz  
GB 0  
PC 1.40

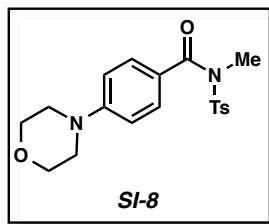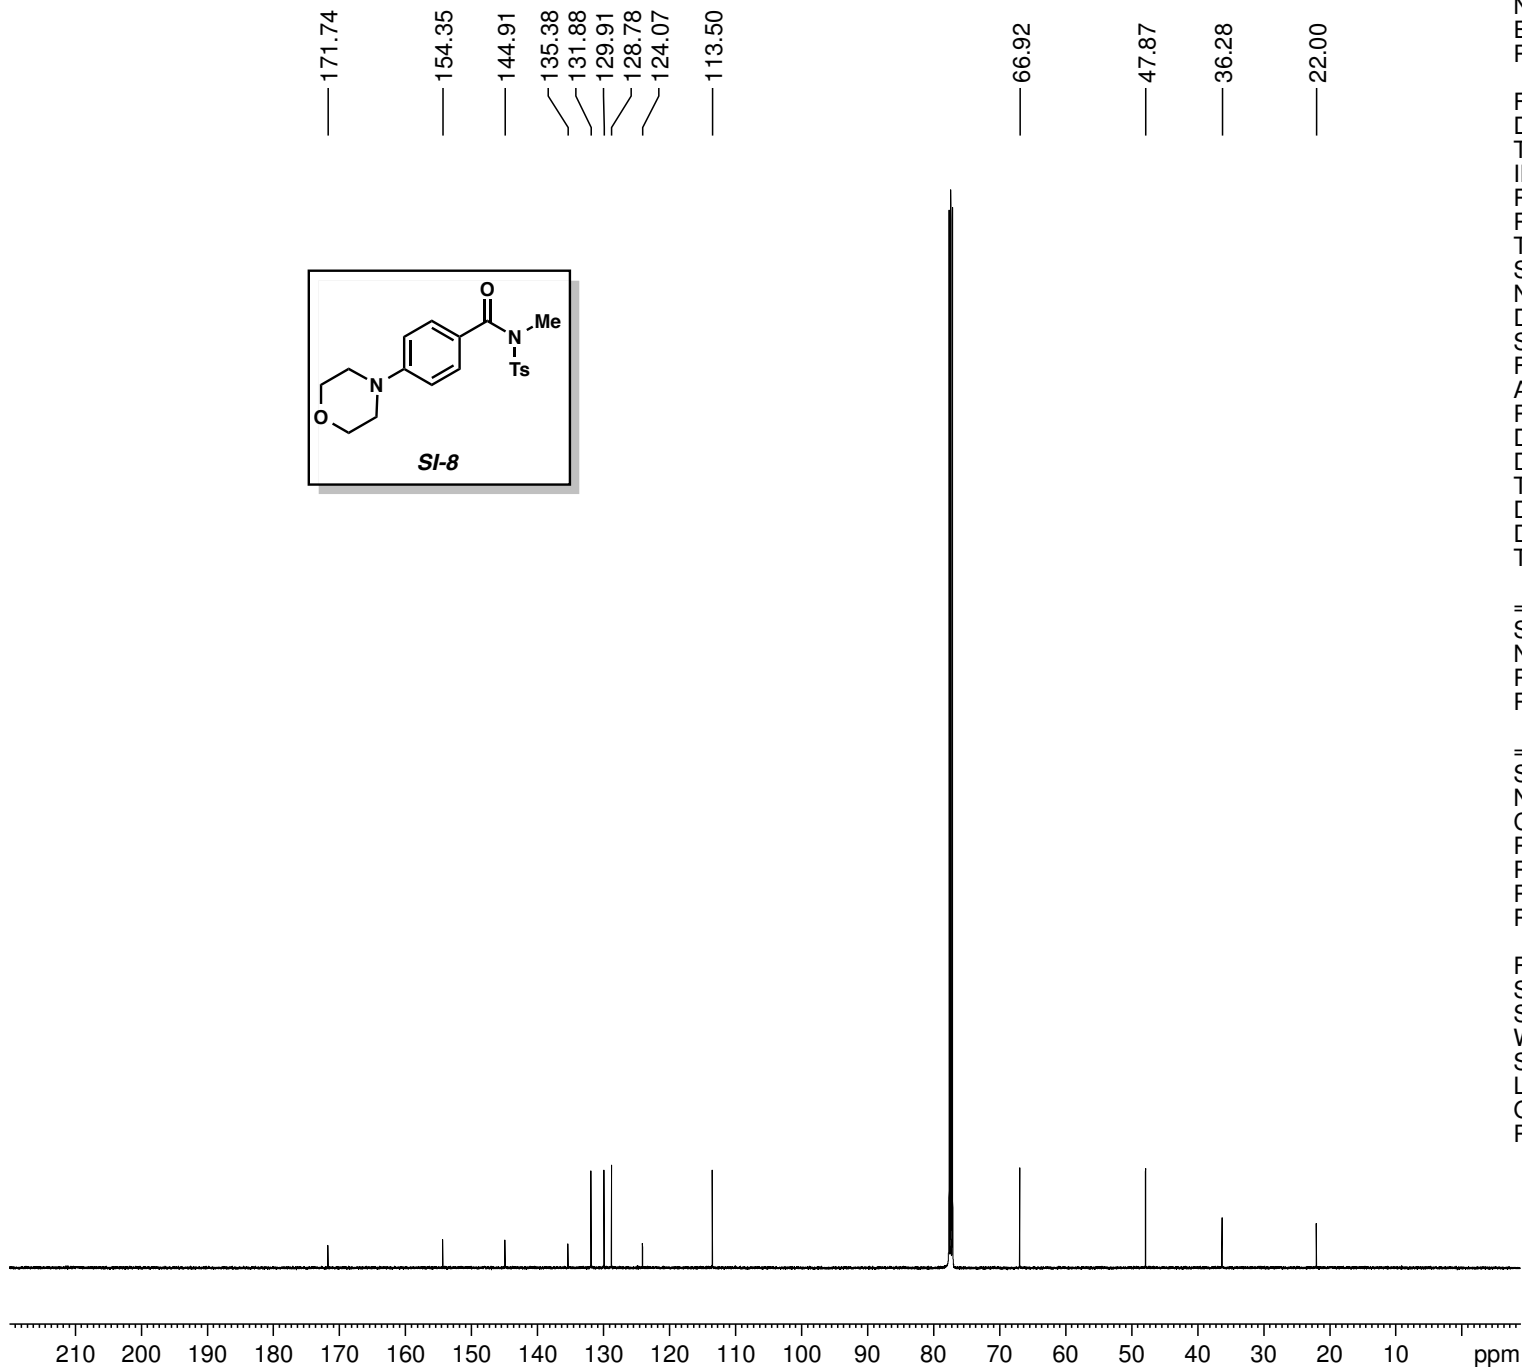

Current Data Parameters  
 NAME BJS-2-paraMorpholineNMeI  
 EXPNO 1  
 PROCNO 1

F2 - Acquisition Parameters  
 Date\_ 20151123  
 Time 9.22  
 INSTRUM av500  
 PROBHD 5 mm DCH 13C-1  
 PULPROG zgpg30  
 TD 65536  
 SOLVENT CDCl3  
 NS 128  
 DS 2  
 SWH 31250.000 Hz  
 FIDRES 0.476837 Hz  
 AQ 1.0485760 sec  
 RG 17.16  
 DW 16.000 usec  
 DE 18.00 usec  
 TE 298.0 K  
 D1 2.00000000 sec  
 D11 0.03000000 sec  
 TD0 1

==== CHANNEL f1 =====  
 SFO1 125.7722511 MHz  
 NUC1 13C  
 P1 9.63 usec  
 PLW1 23.00000000 W

==== CHANNEL f2 =====  
 SFO2 500.1330008 MHz  
 NUC2 1H  
 CPDPRG[2] waltz16  
 PCPD2 80.00 usec  
 PLW2 13.50000000 W  
 PLW12 0.21094000 W  
 PLW13 0.13500001 W

F2 - Processing parameters  
 SI 131072  
 SF 125.7577469 MHz  
 WDW EM  
 SSB 0  
 LB 1.00 Hz  
 GB 0  
 PC 1.40



Current Data Parameters  
NAME JED-1-164-CHLORO-CARE  
EXPNO 1  
PROCNO 1

F2 - Acquisition Parameters  
Date\_ 20160106  
Time 16.27  
INSTRUM av500  
PROBHD 5 mm DCH 13C-1  
PULPROG zgpg30  
TD 65536  
SOLVENT CD3CN  
NS 32  
DS 2  
SWH 31250.000 Hz  
FIDRES 0.476837 Hz  
AQ 1.0485760 sec  
RG 14.67  
DW 16.000 usec  
DE 18.00 usec  
TE 298.0 K  
D1 2.0000000 sec  
D11 0.03000000 sec  
TD0 1

===== CHANNEL f1 =====  
SFO1 125.7722511 MHz  
NUC1 13C  
P1 9.63 usec  
PLW1 23.00000000 W

===== CHANNEL f2 =====  
SFO2 500.1330008 MHz  
NUC2 1H  
CPDPRG[2] waltz16  
PCPD2 80.00 usec  
PLW2 13.50000000 W  
PLW12 0.21094000 W  
PLW13 0.13500001 W

F2 - Processing parameters  
SI 131072  
SF 125.7576653 MHz  
WDW EM  
SSB 0  
LB 1.00 Hz  
GB 0  
PC 1.40

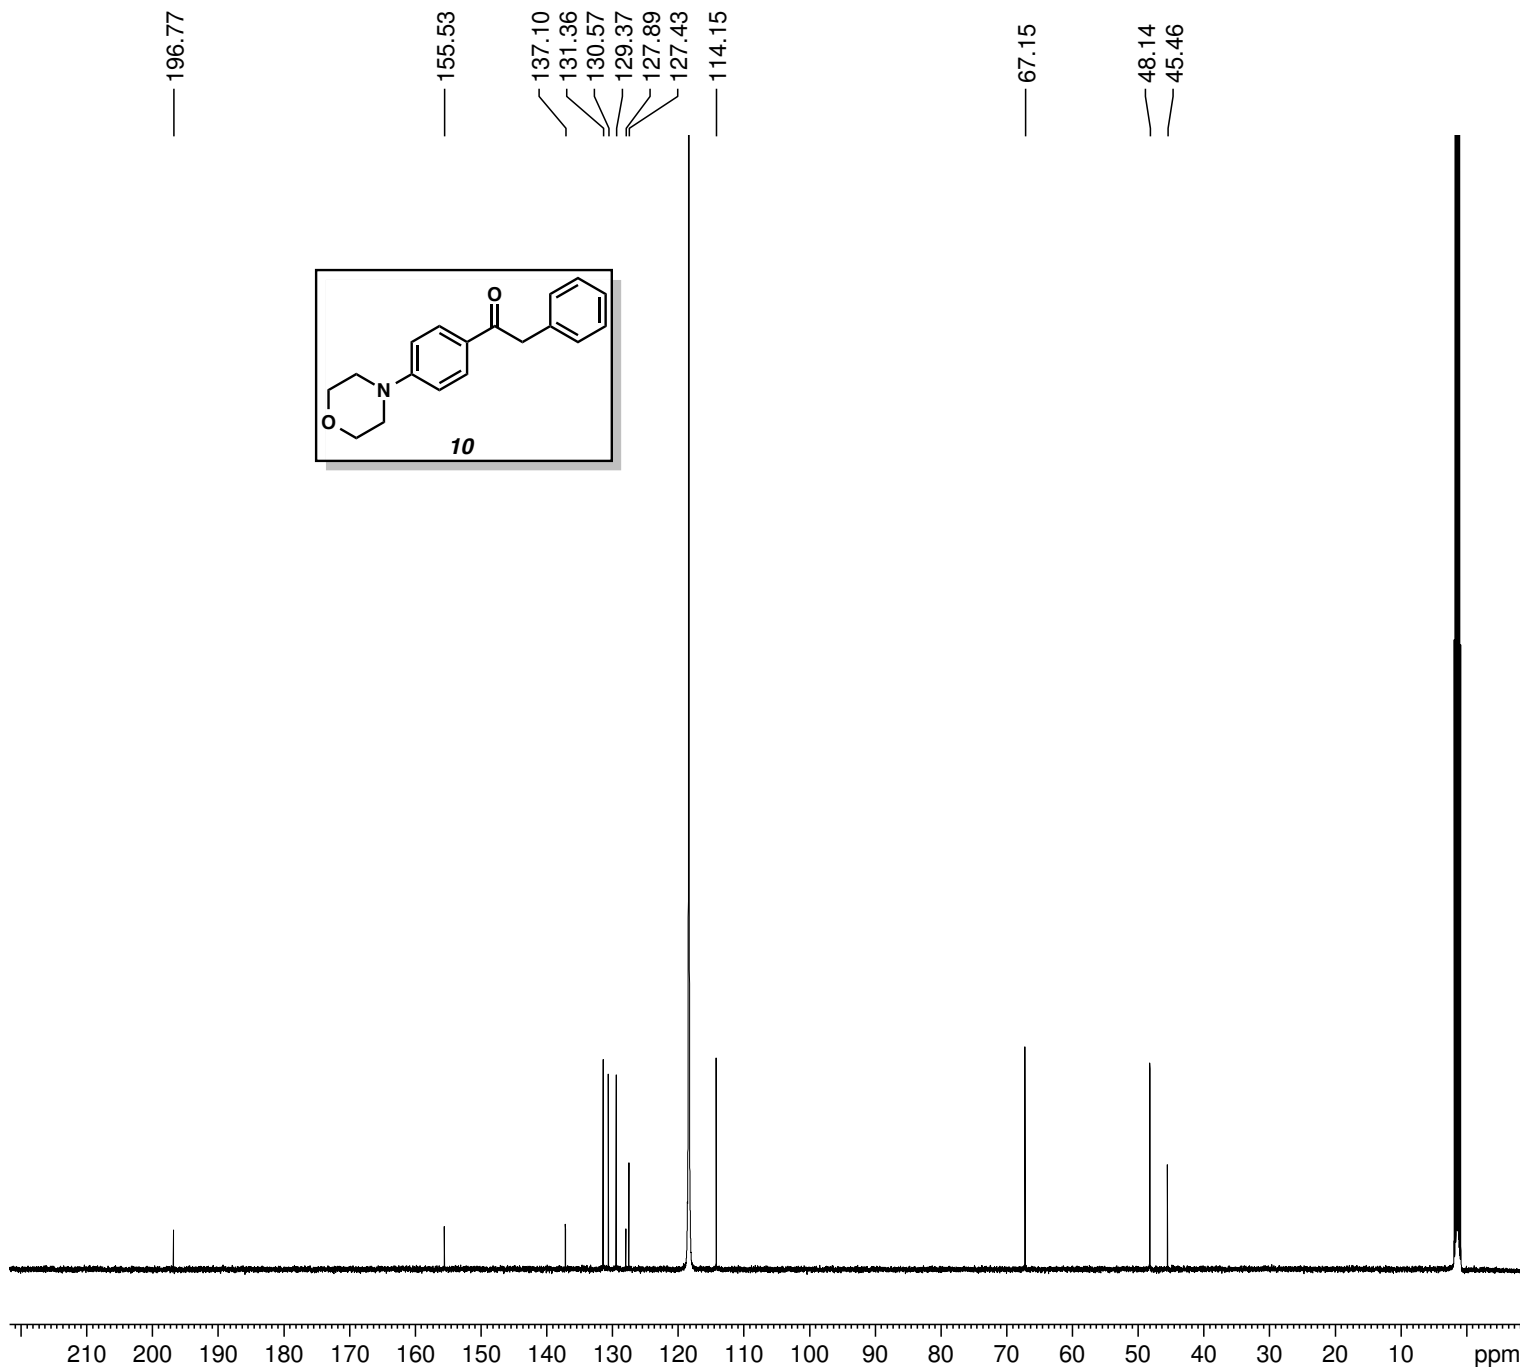

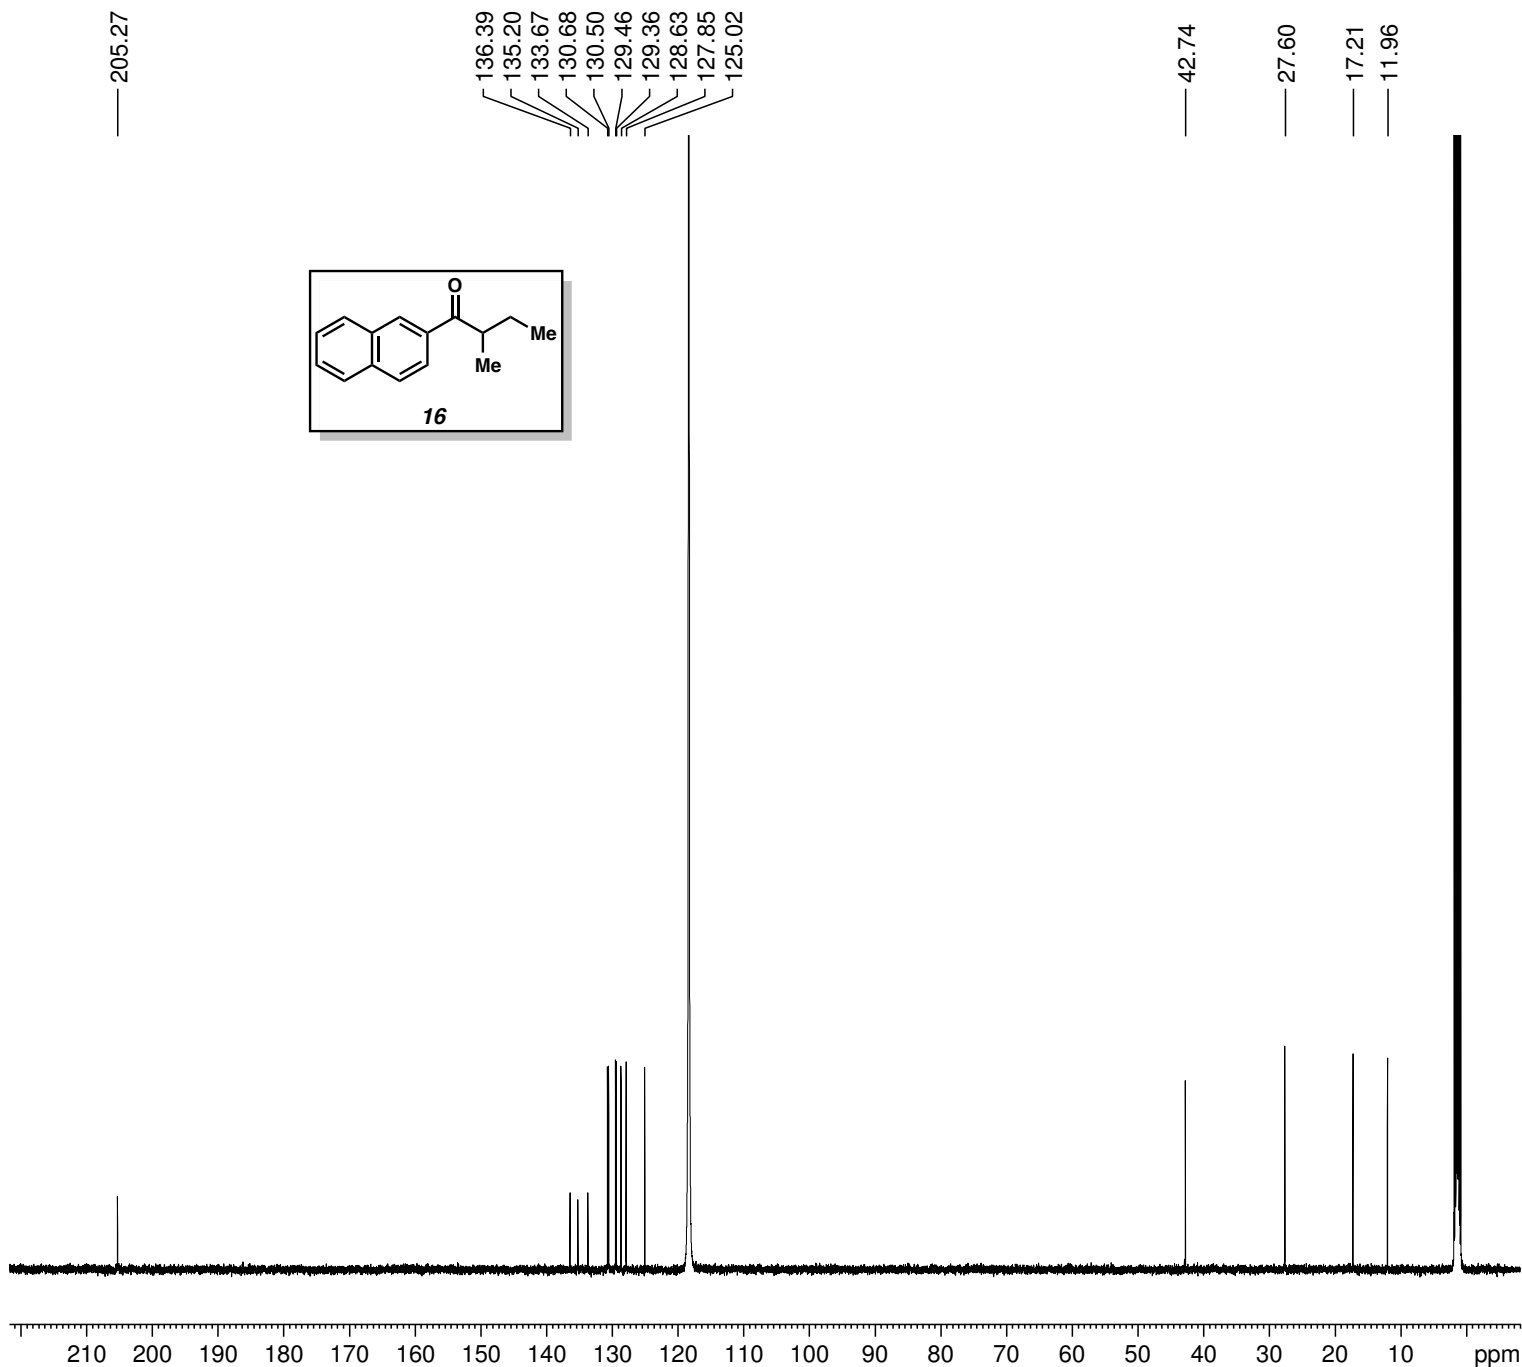

Current Data Parameters  
 NAME NAW-4-206-4-1-CARBON2  
 EXPNO 1  
 PROCNO 1

F2 - Acquisition Parameters  
 Date\_ 20160115  
 Time 10.00  
 INSTRUM av500  
 PROBHD 5 mm DCH 13C-1  
 PULPROG zgpg30  
 TD 65536  
 SOLVENT CD3CN  
 NS 64  
 DS 2  
 SWH 31250.000 Hz  
 FIDRES 0.476837 Hz  
 AQ 1.0485760 sec  
 RG 13.13  
 DW 16.000 usec  
 DE 18.00 usec  
 TE 298.0 K  
 D1 2.00000000 sec  
 D11 0.03000000 sec  
 TD0 1

===== CHANNEL f1 =====  
 SFO1 125.7722511 MHz  
 NUC1 13C  
 P1 9.63 usec  
 PLW1 23.00000000 W

===== CHANNEL f2 =====  
 SFO2 500.1330008 MHz  
 NUC2 1H  
 CPDPRG[2] waltz16  
 PCPD2 80.00 usec  
 PLW2 13.50000000 W  
 PLW12 0.21094000 W  
 PLW13 0.13500001 W

F2 - Processing parameters  
 SI 131072  
 SF 125.7576650 MHz  
 WDW EM  
 SSB 0  
 LB 1.00 Hz  
 GB 0  
 PC 1.40
